# Supplementary material for: Binning sequences using very sparse labels within a metagenome
Source: PubMed Central journal article supplement (PMC2383919; doi:10.1186/1471-2105-9-215), 2008-04-28
Supplement: 1471-2105-9-215-S1.pdf [file 1471-2105-9-215-S1.pdf]

# Supplementary Materials

## Table of Contents

|                                                                                                                      |    |
|----------------------------------------------------------------------------------------------------------------------|----|
| 1. Dataset details .....                                                                                             | 2  |
| i. Lists of All Species in Generated Datasets .....                                                                  | 2  |
| ii. Details of the simulated benchmark datasets .....                                                                | 7  |
| Details of datasets at family level .....                                                                            | 7  |
| Details of datasets at order level .....                                                                             | 8  |
| Details of datasets at class level .....                                                                             | 9  |
| 2. Semi-Supervised Clustering Algorithms .....                                                                       | 10 |
| 3. Clustering Performance Measures .....                                                                             | 12 |
| 4. Binning Algorithms .....                                                                                          | 14 |
| 5. Result evaluation procedures .....                                                                                | 15 |
| 6. Result comparisons of different methods at different taxonomic level for the<br>simulated benchmark datasets..... | 18 |
| i. Family level, $\geq 8$ kb, simLC .....                                                                            | 19 |
| ii. Family level, $\geq 8$ kb, simMC .....                                                                           | 20 |
| iii. Family level, $\geq 10$ reads, simLC.....                                                                       | 21 |
| iv. Family level, $\geq 10$ reads, simMC .....                                                                       | 22 |
| v. Order level, $\geq 8$ kb, simLC .....                                                                             | 23 |
| vi. Order level, $\geq 8$ kb, simMC.....                                                                             | 24 |
| vii. Order level, $\geq 10$ reads, simLC.....                                                                        | 25 |
| viii. Order level, $\geq 10$ reads, simMC .....                                                                      | 26 |
| ix. Class level, $\geq 8$ kb, simLC.....                                                                             | 27 |
| x. Class level, $\geq 8$ kb, simMC.....                                                                              | 28 |
| xi. Class level, $\geq 10$ reads, simLC .....                                                                        | 29 |
| xii. Class level, $\geq 10$ reads, simMC .....                                                                       | 30 |
| 7. GSOM settings and GSOM maps .....                                                                                 | 31 |
| 8. Relationship between CP and the percentage of assigned samples .....                                              | 35 |
| 9. References.....                                                                                                   | 36 |

# 1. Dataset details

## *i. Lists of All Species in Generated Datasets*

Table 1: List of Species in 10Sp-Set1

| NCBI Accession Number | Species Name                                                            | Genome Length |
|-----------------------|-------------------------------------------------------------------------|---------------|
| NC_002162             | <i>Ureaplasma parvum</i> serovar 3 str. ATCC 700970                     | 751716        |
| NC_002516             | <i>Pseudomonas aeruginosa</i> PAO1                                      | 6264400       |
| NC_002937             | <i>Desulfovibrio vulgaris</i> subsp. <i>vulgaris</i> str. Hildenborough | 3570855       |
| NC_002947             | <i>Pseudomonas putida</i> KT2440                                        | 6181860       |
| NC_003047             | <i>Sinorhizobium meliloti</i> 1021                                      | 3654132       |
| NC_003901             | <i>Methanosarcina mazei</i> Go1                                         | 4096342       |
| NC_004547             | <i>Erwinia carotovora</i> subsp. <i>atroseptica</i> SCRI1043            | 5064016       |
| NC_004578             | <i>Pseudomonas syringae</i> pv. <i>tomato</i> str. DC3000               | 6397123       |
| NC_006370             | <i>Photobacterium profundum</i> SS9                                     | 4085301       |
| NC_006510             | <i>Geobacillus kaustophilus</i> HTA426                                  | 3544773       |

Table 2: List of Species in 10Sp-Set2

| NCBI Accession Number | Species Name                                  | Genome Length |
|-----------------------|-----------------------------------------------|---------------|
| NC_005085             | <i>Chromobacterium violaceum</i> ATCC 12472   | 4751080       |
| NC_002935             | <i>Corynebacterium diphtheriae</i> NCTC 13129 | 2488635       |
| NC_006512             | <i>Idiomarina loihiensis</i> L2TR             | 2839318       |
| NC_007626             | <i>Magnetospirillum magneticum</i> AMB-1      | 4967148       |
| NC_008254             | <i>Mesorhizobium</i> sp. BNC1                 | 4412446       |
| NC_007955             | <i>Methanococcoides burtonii</i> DSM 6242     | 2575032       |
| NC_007947             | <i>Methylobacillus flagellatus</i> KT         | 2971517       |
| NC_003485             | <i>Streptococcus pyogenes</i> MGAS8232        | 1895017       |
| NC_007181             | <i>Sulfolobus acidocaldarius</i> DSM 639      | 2225959       |
| NC_002967             | <i>Treponema denticola</i> ATCC 35405         | 2843201       |

Table 3: List of Species in 10Sp-Set3

| NCBI<br>Accession<br>Number | Species Name                                                | Genome<br>Length |
|-----------------------------|-------------------------------------------------------------|------------------|
| NC_007760                   | <i>Anaeromyxobacter dehalogenans</i> 2CP-C                  | 5013479          |
| NC_006347                   | <i>Bacteroides fragilis</i> YCH46                           | 5277274          |
| NC_002163                   | <i>Campylobacter jejuni</i> subsp. <i>jejuni</i> NCTC 11168 | 1641481          |
| NC_006677                   | <i>Gluconobacter oxydans</i> 621H                           | 2702173          |
| NC_008242                   | <i>Mesorhizobium</i> sp. BNC1                               | 343931           |
| NC_008254                   | <i>Mesorhizobium</i> sp. BNC1                               | 4412446          |
| NC_004432                   | <i>Mycoplasma penetrans</i> HF-2                            | 1358633          |
| NC_007492                   | <i>Pseudomonas fluorescens</i> PfO-1                        | 6438405          |
| NC_005773                   | <i>Pseudomonas syringae</i> pv. <i>phaseolicola</i> 1448A   | 5928787          |
| NC_004337                   | <i>Shigella flexneri</i> 2a str. 301                        | 4607203          |
| NC_003919                   | <i>Xanthomonas axonopodis</i> pv. <i>citri</i> str. 306     | 5175554          |

Table 4: List of Species in 20Sp-Set1

| NCBI<br>Accession<br>Number | Species Name                                                        | Genome<br>Length |
|-----------------------------|---------------------------------------------------------------------|------------------|
| NC_009348                   | <i>Aeromonas salmonicida</i> subsp. <i>salmonicida</i> A449         | 4702402          |
| NC_000918                   | <i>Aquifex aeolicus</i> VF5                                         | 1551335          |
| NC_007716                   | Aster yellows witches'-broom phytoplasma AYWB                       | 706569           |
| NC_008783                   | <i>Bartonella bacilliformis</i> KC583                               | 1445021          |
| NC_002696                   | <i>Caulobacter crescentus</i> CB15                                  | 4016947          |
| NC_003361                   | <i>Chlamydophila caviae</i> GPIC                                    | 1173390          |
| NC_007146                   | <i>Haemophilus influenzae</i> 86-028NP                              | 1913428          |
| NC_008309                   | <i>Haemophilus somnus</i> 129PT                                     | 2007700          |
| NC_006055                   | <i>Mesoplasma florum</i> L1                                         | 793224           |
| NC_007644                   | <i>Moorella thermoacetica</i> ATCC 39073                            | 2628784          |
| NC_002755                   | <i>Mycobacterium tuberculosis</i> CDC1551                           | 4403837          |
| NC_005364                   | <i>Mycoplasma mycoides</i> subsp. <i>mycoides</i> SC str. PG1       | 1211703          |
| NC_002950                   | <i>Porphyromonas gingivalis</i> W83                                 | 2343476          |
| NC_005072                   | <i>Prochlorococcus marinus</i> subsp. <i>pastoris</i> str. CCMP1986 | 1657990          |
| NC_007969                   | <i>Psychrobacter cryohalolentis</i> K5                              | 3059876          |
| NC_003155                   | <i>Streptomyces avermitilis</i> MA-4680                             | 9025608          |

|           |                                     |         |
|-----------|-------------------------------------|---------|
| NC_000911 | <i>Synechocystis</i> sp. PCC 6803   | 3573470 |
| NC_007759 | <i>Syntrophus aciditrophicus</i> SB | 3179300 |
| NC_000853 | <i>Thermotoga maritima</i> MSB8     | 1860725 |
| NC_006840 | <i>Vibrio fischeri</i> ES114        | 2906179 |

Table 5: List of Species in 20Sp-Set2

| NCBI Accession Number | Species Name                                                           | Genome Length |
|-----------------------|------------------------------------------------------------------------|---------------|
| NC_008782             | <i>Acidovorax</i> sp. JS42                                             | 4448856       |
| NC_006274             | <i>Bacillus cereus</i> E33L                                            | 5300915       |
| NC_001318             | <i>Borrelia burgdorferi</i> B31                                        | 910724        |
| NC_008599             | <i>Campylobacter fetus</i> subsp. <i>fetus</i> 82-40                   | 1773615       |
| NC_008278             | <i>Frankia alni</i> ACN14a                                             | 7497934       |
| NC_002662             | <i>Lactococcus lactis</i> subsp. <i>lactis</i> II1403                  | 2365589       |
| NC_008011             | <i>Lawsonia intracellularis</i> PHE/MN1-00                             | 1457619       |
| NC_005823             | <i>Leptospira interrogans</i> serovar Copenhageni str. Fiocruz L1-130  | 4277185       |
| NC_008531             | <i>Leuconostoc mesenteroides</i> subsp. <i>mesenteroides</i> ATCC 8293 | 2038396       |
| NC_006300             | <i>Mannheimia succiniciproducens</i> MBEL55E                           | 2314078       |
| NC_007681             | <i>Methanosphaera stadtmanae</i> DSM 3091                              | 1767403       |
| NC_007644             | <i>Moorella thermoacetica</i> ATCC 39073                               | 2628784       |
| NC_004432             | <i>Mycoplasma penetrans</i> HF-2                                       | 1358633       |
| NC_007925             | <i>Rhodopseudomonas palustris</i> BisB18                               | 5513844       |
| NC_007384             | <i>Shigella sonnei</i> Ss046                                           | 4825265       |
| NC_007622             | <i>Staphylococcus aureus</i> RF122                                     | 2742531       |
| NC_002976             | <i>Staphylococcus epidermidis</i> RP62A                                | 2616530       |
| NC_007168             | <i>Staphylococcus haemolyticus</i> JCSC1435                            | 2685015       |
| NC_003028             | <i>Streptococcus pneumoniae</i> TIGR4                                  | 2160842       |
| NC_006833             | <i>Wolbachia endosymbiont</i> strain TRS of <i>Brugia malayi</i>       | 1080084       |

Table 6: List of Species in 20Sp-Set3

| NCBI<br>Accession<br>Number | Species Name                                                     | Genome<br>Length |
|-----------------------------|------------------------------------------------------------------|------------------|
| NC_007618                   | <i>Brucella melitensis</i> biovar Abortus 2308                   | 2121359          |
| NC_002935                   | <i>Corynebacterium diphtheriae</i> NCTC 13129                    | 2488635          |
| NC_002971                   | <i>Coxiella burnetii</i> RSA 493                                 | 1995281          |
| NC_008571                   | <i>Gramella forsetii</i> KT0803                                  | 3798465          |
| NC_008212                   | <i>Haloquadratum walsbyi</i> DSM 16790                           | 3132494          |
| NC_009135                   | <i>Methanococcus maripaludis</i> C5                              | 1780761          |
| NC_003552                   | <i>Methanosarcina acetivorans</i> C2A                            | 5751492          |
| NC_008596                   | <i>Mycobacterium smegmatis</i> str. MC2 155                      | 6988209          |
| NC_000962                   | <i>Mycobacterium tuberculosis</i> H37Rv                          | 4411532          |
| NC_002771                   | <i>Mycoplasma pulmonis</i> UAB CTIP                              | 963879           |
| NC_007614                   | <i>Nitrosospira multiformis</i> ATCC 25196                       | 3184243          |
| NC_005126                   | <i>Photorhabdus luminescens</i> subsp. <i>laumondii</i> TTO1     | 5688987          |
| NC_008027                   | <i>Pseudomonas entomophila</i> L48                               | 5888780          |
| NC_007954                   | <i>Shewanella denitrificans</i> OS217                            | 4545906          |
| NC_007613                   | <i>Shigella boydii</i> Sb227                                     | 4519823          |
| NC_008022                   | <i>Streptococcus pyogenes</i> MGAS10270                          | 1928252          |
| NC_007516                   | <i>Synechococcus</i> sp. CC9605                                  | 2510659          |
| NC_007575                   | <i>Thiomicrospira denitrificans</i> ATCC 33889                   | 2201561          |
| NC_005139                   | <i>Vibrio vulnificus</i> YJ016                                   | 3354505          |
| NC_006833                   | <i>Wolbachia endosymbiont</i> strain TRS of <i>Brugia malayi</i> | 1080084          |

Table 7: List of Species in 40Sp-Set1

| NCBI<br>Accession<br>Number | Species Name                                 | Genome<br>Length |
|-----------------------------|----------------------------------------------|------------------|
| NC_008260                   | <i>Alcanivorax borkumensis</i> SK2           | 3120143          |
| NC_008541                   | <i>Arthrobacter</i> sp. FB24                 | 4698945          |
| NC_006513                   | <i>Azoarcus</i> sp. EbN1                     | 4296230          |
| NC_003997                   | <i>Bacillus anthracis</i> str. Ames          | 5227293          |
| NC_006582                   | <i>Bacillus clausii</i> KSM-K16              | 4303871          |
| NC_006322                   | <i>Bacillus licheniformis</i> ATCC 14580     | 4222645          |
| NC_004663                   | <i>Bacteroides thetaiotaomicron</i> VPI-5482 | 6260361          |
| NC_002928                   | <i>Bordetella parapertussis</i> 12822        | 4773551          |

|           |                                                                                 |         |
|-----------|---------------------------------------------------------------------------------|---------|
| NC_002696 | <i>Caulobacter crescentus</i> CB15                                              | 4016947 |
| NC_005085 | <i>Chromobacterium violaceum</i> ATCC 12472                                     | 4751080 |
| NC_001263 | <i>Deinococcus radiodurans</i> R1                                               | 2648638 |
| NC_000907 | <i>Haemophilus influenzae</i> Rd KW20                                           | 1830138 |
| NC_008529 | <i>Lactobacillus delbrueckii</i> subsp. <i>bulgaricus</i> ATCC BAA-365          | 1856951 |
| NC_008555 | <i>Listeria welshimeri</i> serovar 6b str. SLCC5334                             | 2814130 |
| NC_000909 | <i>Methanocaldococcus jannaschii</i> DSM 2661                                   | 1664970 |
| NC_002977 | <i>Methylococcus capsulatus</i> str. Bath                                       | 3304561 |
| NC_009077 | <i>Mycobacterium</i> sp. JLS                                                    | 6048425 |
| NC_007633 | <i>Mycoplasma capricolum</i> subsp. <i>capricolum</i> ATCC 27343                | 1010023 |
| NC_000912 | <i>Mycoplasma pneumoniae</i> M129                                               | 816394  |
| NC_007481 | <i>Pseudoalteromonas haloplanktis</i> TAC125                                    | 3214944 |
| NC_002947 | <i>Pseudomonas putida</i> KT2440                                                | 6181863 |
| NC_008709 | <i>Psychromonas ingrahamii</i> 37                                               | 4559598 |
| NC_007643 | <i>Rhodospirillum rubrum</i> ATCC 11170                                         | 4352825 |
| NC_007109 | <i>Rickettsia felis</i> URRWXCals                                               | 1485148 |
| NC_006142 | <i>Rickettsia typhi</i> str. Wilmington                                         | 1111496 |
| NC_006511 | <i>Salmonella enterica</i> subsp. <i>enterica</i> serovar Paratyphi A str. ATCC | 4585229 |
| NC_008750 | <i>Shewanella</i> sp. W3-18-1                                                   | 4708380 |
| NC_004741 | <i>Shigella flexneri</i> 2a str. 2457T                                          | 4599354 |
| NC_007384 | <i>Shigella sonnei</i> Ss046                                                    | 4825265 |
| NC_009009 | <i>Streptococcus sanguinis</i> SK36                                             | 2388435 |
| NC_007181 | <i>Sulfolobus acidocaldarius</i> DSM 639                                        | 2225959 |
| NC_006177 | <i>Symbiobacterium thermophilum</i> IAM 14863                                   | 3566135 |
| NC_007333 | <i>Thermobifida fusca</i> YX                                                    | 3642249 |
| NC_006624 | <i>Thermococcus kodakarensis</i> KOD1                                           | 2088737 |
| NC_002578 | <i>Thermoplasma acidophilum</i> DSM 1728                                        | 1564906 |
| NC_002689 | <i>Thermoplasma volcanium</i> GSS1                                              | 1584804 |
| NC_008312 | <i>Trichodesmium erythraeum</i> IMS101                                          | 7750108 |
| NC_004572 | <i>Tropheryma whipplei</i> str. Twist                                           | 927303  |
| NC_002505 | <i>Vibrio cholerae</i> O1 biovar eltor str. N16961                              | 2961149 |
| NC_002488 | <i>Xylella fastidiosa</i> 9a5c                                                  | 2679306 |

## ii. Details of the simulated benchmark datasets

### Details of datasets at family level

|                   | Arachne           |                   | Phrap             |                   |                  |
|-------------------|-------------------|-------------------|-------------------|-------------------|------------------|
| simLC_8kb         | <i>Taxa</i>       | <i>#ofContig</i>  | <i>Taxa</i>       | <i>#ofContig</i>  |                  |
|                   | Bradyrhizobiaceae | 202               | Bradyrhizobiaceae | 229               |                  |
| simMC_8kb         | <i>Taxa</i>       | <i>#ofContig</i>  | <i>Taxa</i>       | <i>#ofContig</i>  |                  |
|                   | Bradyrhizobiaceae | 201               | Bradyrhizobiaceae | 296               |                  |
|                   | Xanthomonadaceae  | 100               | Xanthomonadaceae  | 105               |                  |
| simLC_10reads     | <i>Taxa</i>       | <i>#ofContig</i>  | <i>Taxa</i>       | <i>#ofContig</i>  |                  |
|                   | Bradyrhizobiaceae | 348               | Bradyrhizobiaceae | 428               |                  |
|                   | Flexibacteraceae  | 6                 | Flexibacteraceae  | 23                |                  |
|                   | Gloeocapsaceae@   | 5                 | Xanthomonadaceae  | 16                |                  |
|                   | Xanthomonadaceae  | 7                 | Geobacteraceae    | 1                 |                  |
|                   | Burkholderiaceae  | 1                 | Gloeocapsaceae@   | 7                 |                  |
|                   |                   |                   | Methylophilaceae  | 1                 |                  |
|                   |                   |                   | Pelobacteraceae   | 1                 |                  |
|                   |                   |                   | Shewanellaceae    | 1                 |                  |
|                   |                   |                   | Streptococcaceae  | 1                 |                  |
|                   |                   |                   | Moraxellaceae     | 1                 |                  |
|                   |                   |                   | Burkholderiaceae  | 1                 |                  |
|                   |                   |                   | Ferroplasmaceae   | 1                 |                  |
|                   | simMC_10reads     | <i>Taxa</i>       | <i>#ofContig</i>  | <i>Taxa</i>       | <i>#ofContig</i> |
|                   |                   | Bradyrhizobiaceae | 1053              | Bradyrhizobiaceae | 1398             |
|                   |                   | Xanthomonadaceae  | 311               | Xanthomonadaceae  | 555              |
| Moraxellaceae     |                   | 1                 | Nitrosomonadaceae | 1                 |                  |
| Pelobacteraceae   |                   | 1                 | Rhodospirillaceae | 9                 |                  |
| Rhodospirillaceae |                   | 3                 | Alteromonadaceae  | 1                 |                  |
| Gloeocapsaceae@   |                   | 3                 | Streptococcaceae  | 1                 |                  |
|                   |                   |                   | Shewanellaceae    | 2                 |                  |
|                   |                   | Burkholderiaceae  | 2                 |                   |                  |
|                   |                   | Moraxellaceae     | 2                 |                   |                  |
|                   |                   | Pseudomonadaceae  | 1                 |                   |                  |
|                   |                   | Gloeocapsaceae@   | 7                 |                   |                  |
|                   |                   | Pelobacteraceae   | 1                 |                   |                  |

## Details of datasets at order level

|                      | Arachne            |                    | Phrap              |                  |
|----------------------|--------------------|--------------------|--------------------|------------------|
| <b>simLC_8kb</b>     | <i>Taxa</i>        | <i>#ofContig</i>   | <i>Taxa</i>        | <i>#ofContig</i> |
|                      | Rhizobiales        | 202                | Rhizobiales        | 229              |
| <b>simMC_8kb</b>     | <i>Taxa</i>        | <i>#ofContig</i>   | <i>Taxa</i>        | <i>#ofContig</i> |
|                      | Rhizobiales        | 201                | Rhizobiales        | 296              |
|                      | Xanthomonadales    | 100                | Xanthomonadales    | 105              |
| <b>simLC_10reads</b> | <i>Taxa</i>        | <i>#ofContig</i>   | <i>Taxa</i>        | <i>#ofContig</i> |
|                      | Rhizobiales        | 348                | Rhizobiales        | 428              |
|                      | Sphingobacteriales | 6                  | Sphingobacteriales | 23               |
|                      | Chroococcales      | 5                  | Xanthomonadales    | 16               |
|                      | Xanthomonadales    | 7                  | Desulfuromonadales | 2                |
|                      | Burkholderiales    | 1                  | Chroococcales      | 7                |
|                      |                    |                    | Methylophilales    | 1                |
|                      |                    |                    | Alteromonadales    | 1                |
|                      |                    |                    | Lactobacillales    | 1                |
|                      |                    |                    | Pseudomonadales    | 1                |
|                      |                    |                    | Burkholderiales    | 1                |
|                      |                    |                    | Thermoplasmatales  | 1                |
|                      |                    |                    |                    |                  |
|                      |                    |                    |                    |                  |
| <b>simMC_10reads</b> | <i>Taxa</i>        | <i>#ofContig</i>   | <i>Taxa</i>        | <i>#ofContig</i> |
|                      | Rhizobiales        | 1053               | Rhizobiales        | 1398             |
|                      | Xanthomonadales    | 311                | Xanthomonadales    | 555              |
|                      | Pseudomonadales    | 1                  | Nitrosomonadales   | 1                |
|                      | Desulfuromonadales | 1                  | Rhodospirillales   | 9                |
|                      | Rhodospirillales   | 3                  | Alteromonadales    | 3                |
|                      | Chroococcales      | 3                  | Lactobacillales    | 1                |
|                      |                    |                    | Burkholderiales    | 2                |
|                      |                    | Pseudomonadales    | 3                  |                  |
|                      |                    | Chroococcales      | 7                  |                  |
|                      |                    | Desulfuromonadales | 1                  |                  |



## Details of datasets at class level

|                      | Arachne              |                     | Phrap                |                  |
|----------------------|----------------------|---------------------|----------------------|------------------|
| <b>simLC_8kb</b>     | <i>Taxa</i>          | <i>#ofContig</i>    | <i>Taxa</i>          | <i>#ofContig</i> |
|                      | Alphaproteobacteria  | 202                 | Alphaproteobacteria  | 229              |
| <b>simMC_8kb</b>     | <i>Taxa</i>          | <i>#ofContig</i>    | <i>Taxa</i>          | <i>#ofContig</i> |
|                      | Alphaproteobacteria  | 201                 | Alphaproteobacteria  | 296              |
|                      | Gammaaproteobacteria | 100                 | Gammaaproteobacteria | 105              |
| <b>simLC_10reads</b> | <i>Taxa</i>          | <i>#ofContig</i>    | <i>Taxa</i>          | <i>#ofContig</i> |
|                      | Alphaproteobacteria  | 348                 | Alphaproteobacteria  | 428              |
|                      | Sphingobacteria      | 6                   | Sphingobacteria      | 23               |
|                      | Cyanobacteria        | 5                   | Gammaaproteobacteria | 18               |
|                      | Gammaaproteobacteria | 7                   | Deltaproteobacteria  | 2                |
|                      | Betaproteobacteria   | 1                   | Cyanobacteria        | 7                |
|                      |                      |                     | Betaproteobacteria   | 2                |
|                      |                      | Bacilli             | 1                    |                  |
|                      |                      | Thermoplasmata      | 1                    |                  |
| <b>simMC_10reads</b> | <i>Taxa</i>          | <i>#ofContig</i>    | <i>Taxa</i>          | <i>#ofContig</i> |
|                      | Alphaproteobacteria  | 1056                | Alphaproteobacteria  | 1407             |
|                      | Gammaaproteobacteria | 312                 | Gammaaproteobacteria | 561              |
|                      | Deltaproteobacteria  | 1                   | Betaproteobacteria   | 3                |
|                      | Cyanobacteria        | 3                   | Bacilli              | 1                |
|                      |                      | Cyanobacteria       | 7                    |                  |
|                      |                      | Deltaproteobacteria | 1                    |                  |

## 2. Semi-Supervised Clustering Algorithms

### *COP K-Means [1]*

COP K-Means stands for CONstraint-Partitioning K-Means. It uses labelled instances as constraints to restrict the K-Means clustering process. All pairs of labelled instances are marked as either ‘must-link’ or ‘cannot-link’, which are the constraints for two instances having the same or different labels respectively. During the clustering process, a feasible partition will be produced to satisfy all these constraints. Since a different initialization of the K-centres will result in a different solution, we take the best solution in 100 runs with random K-centre initialization.

### *Seeded K-Means [2]*

Instead of using the labelled instances as constraints to restrict the clustering process, Seeded K-Means uses them to initialise the K-centres. When there is more than one labelled instance in a class, the average is taken to be the initial centre. Since, the initialisation of this algorithm is restricted by the labelled data, no multiple initialisations are required.

### *Constrained K-Means [2]*

This algorithm is similar to the combination of COP-KMeans and Seeded-KMeans. It uses the labelled instances to initialise the K-centres as well as restrict the clustering process when finding the feasible partitioning.

### *Multi-class Transductive Support Vector Machine (TSVM)*

Support Vector Machine (SVM) is a supervised two-class classification algorithm. Transductive Support Vector Machine (TSVM) is a semi-supervised two-class learning algorithm. SVM finds a hyper-plane to be placed at the maximum margin between the two labelled classes. Additionally, in TSVM, the hyper-plane is adjusted towards boundary of low density unlabelled instances. We used the available program: SVM-Light (<http://svmlight.joachims.org>) in this paper. SVM-Light implements the TSVM as described by Joachims [3].

Clustering sequence fragments from several genomes is a multi-class problem. We employ the multi-class architecture proposed by Bruzzone et al. [4] to implement the multi-class TSVM. The architecture diagram is shown below:

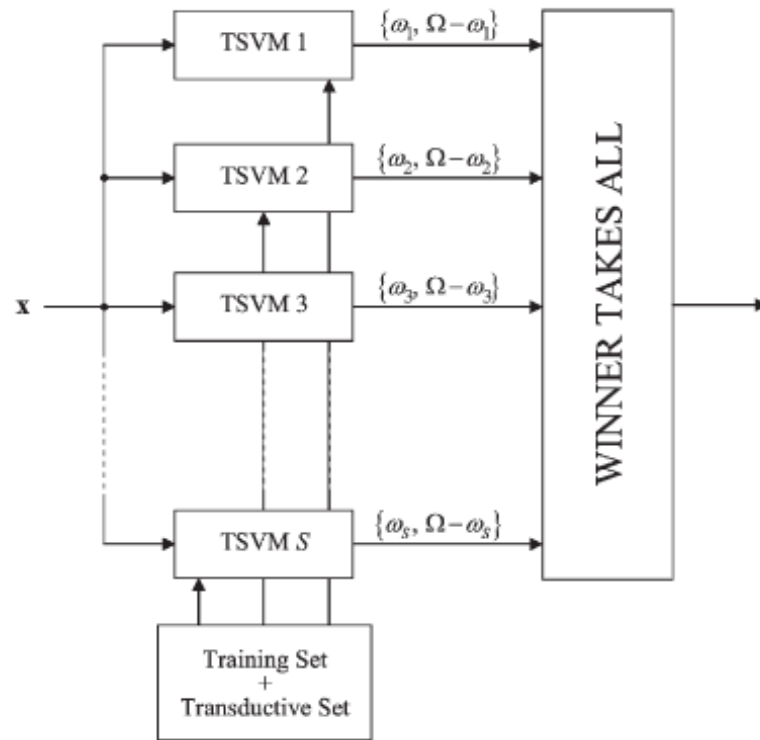

Figure 1: The multi-class TSVM architecture

### 3. Clustering Performance Measures

#### F-measure calculation for clustering evaluation

F-measure was introduced by van Rijsbergen [5] in the field of information retrieval to evaluate the effectiveness of a retrieval system. It has become a traditional clustering evaluation measure when the actual class label can be achieved for evaluation.

The calculation of F-measure is clearer to be presented with a contingency table:

|                | B <sub>1</sub> | B <sub>i</sub> | ... | B <sub>m</sub> | Sum      | Recall | F-measure |
|----------------|----------------|----------------|-----|----------------|----------|--------|-----------|
| A <sub>1</sub> | $n_{11}$       | $n_{1i}$       | ... | $n_{1m}$       | $n_{1.}$ | $R_1$  | $F_1$     |
| A <sub>i</sub> | $n_{i1}$       | $n_{ii}$       | ... | $n_{im}$       | $n_{i.}$ | $R_i$  | $F_i$     |
| ⋮              | ⋮              | ⋮              |     | ⋮              | ⋮        | ⋮      | ⋮         |
| A <sub>m</sub> | $n_{m1}$       | $n_{mi}$       | ... | $n_{mm}$       | $n_{m.}$ | $R_m$  | $F_m$     |
| Sum            | $n_{.1}$       | $n_{.i}$       | ... | $n_{.m}$       | $N$      |        |           |
| Precision      | $P_1$          | $P_i$          | ... | $P_m$          |          |        |           |

Where

- $m$  is the number of class
- $A_1, A_i, \dots, A_m$  are the actual classes
- $B_1, B_i, \dots, B_m$  are the predicted classes
- $n_{ii}$  is the number of correctly predicted samples (Number of  $B_i$  predict as  $A_i$ )
- $n_{i.} = \sum_j n_{ij}$  is the total number of samples are in the actual class  $A_i$
- $n_{.i} = \sum_j n_{ji}$  is the total number of samples are in the predicted class  $B_i$
- $N = \sum_j n_{j.} = \sum_j n_{.j}$  is the total number of samples in the dataset
- $R_i = \frac{n_{ii}}{n_{i.}}$  is the Recall value for  $A_i$
- $P_i = \frac{n_{ii}}{n_{.i}}$  is the Precision value for  $B_i$
- $F_i = \frac{2 \times P_i \times R_i}{P_i + R_i}$  is the F-measure for class  $A_i$

Finally, the weighted F-measure for the clustering result is calculated from:

$$F = \sum_j \frac{n_{j.}}{N} F_j$$

### Adjusted Rand Index calculation for clustering evaluation

The Rand Index was proposed by [6] to evaluate the clustering quality when the correct labels can be used during the evaluation. Later, the Adjusted Rand Index was introduced by [7] to correct the non-zero expected value of Rand Index even with randomly distributed clusters. The Adjusted Rand Index has become a popular clustering evaluation measure when the actual class label can be achieved for evaluation.

The following contingency table is used to demonstrate the calculation of Adjusted Rand Index:

|                | B <sub>1</sub> | B <sub>j</sub> | ... | B <sub>k</sub> | Sum      |
|----------------|----------------|----------------|-----|----------------|----------|
| A <sub>1</sub> | $n_{11}$       | $n_{1j}$       | ... | $n_{1k}$       | $n_{1.}$ |
| A <sub>i</sub> | $n_{i1}$       | $n_{ij}$       | ... | $n_{ik}$       | $n_{i.}$ |
| ⋮              | ⋮              | ⋮              |     | ⋮              | ⋮        |
| A <sub>m</sub> | $n_{m1}$       | $n_{mj}$       | ... | $n_{mk}$       | $n_{m.}$ |
| Sum            | $n_{.1}$       | $n_{.j}$       | ... | $n_{.k}$       | $N$      |

Where

- $m$  is the number of actual class
- $k$  is the number of predicted classes
- $A_1, A_i, \dots, A_m$  are the actual classes
- $B_1, B_j, \dots, B_k$  are the predicted classes
- $n_{i.} = \sum_j^k n_{ij}$  is the total number of samples are in the actual class  $A_i$
- $n_{.j} = \sum_i^m n_{ij}$  is the total number of samples are in the predicted class  $B_j$
- $N = \sum_i^m n_{i.} = \sum_j^k n_{.j}$  is the total number of samples in the dataset

The Adjusted Rand Index is calculated using the following equation:

$$\frac{\sum_{i,j} \binom{n_{ij}}{2} - \sum_i \binom{n_{i.}}{2} \sum_j \binom{n_{.j}}{2} / \binom{N}{2}}{\frac{1}{2} \left[ \sum_i \binom{n_{i.}}{2} + \sum_j \binom{n_{.j}}{2} \right] - \sum_i \binom{n_{i.}}{2} \sum_j \binom{n_{.j}}{2} / \binom{N}{2}}$$

## 4. Binning Algorithms

Since the binning results of these algorithms presented in this paper were generated by Mavromatis et. al. [8], the detail explanations and settings of the algorithms can be found in the supplementary material of that paper. For the completeness of this paper, these algorithms are briefly described here.

### *BLAST*

This method is a sequence base binning method. It used fgenesb to predict the genes in the metagenomic sequences against the NCBI protein sequences. Then it assigned the sequences to taxonomic classes according to the distribution of BLAST hits of the predicted genes against the reference databases.

### *k-mer [9]*

This is a composition-base binning method. It assigns the sequence fragments to the taxonomic family of the best matching isolate bin by calculating the oligonucleotide frequencies of the sequences and compared to a reference set of finished genomes.

### *PhyloPythia [10]*

PhyloPythia is also a composition-base binning method. It assigned the sequence fragments to phylogenetic clades by comparing the oligonucleotide composition patterns between the metagenomic sequences and a reference set of genomes. There are two models can be built: generic model and species-specific model. The creation of the generic model uses the sequence patterns of a reference set of isolate genomes and the sample-specific model additionally includes about 100 kb of marker-gene labelled sequence fragments from each of the dominant population of the sample. There is one p-value setting (confidence setting) which is determined by the distance of the sample sequences from the hyperplane of the classifier. For example, a higher p-value (eg. p:0.85) means that only samples having a large enough distance to the hyperplane of a specific clade will be assigned to the clade.

## 5. Result evaluation procedures

In the following, the exact data extraction and evaluation procedure is described and the URLs of the required files are listed at the end of this section.

1. Use the ContigReads.txt (A) and the FASTA format contig files (B) to obtain contigs that are  $\geq 8$  kb (in which the wildcard bases ‘N’ does not take into account for the actual sequence length) or are  $\geq 10$  reads.
2. Use the contig\_assignment.txt (C) to find out all taxonomic levels (as the true class) for each eligible contigs ranging from domain down to strain level. Let us call this the ActualContigTaxa file. E.g. In the case for “simLC,  $\geq 10$  reads, phrap”, there are 482 contigs in the ActualContigTaxa file. In this dataset, at the order level, there are 11 different actual taxa (as shown in Table 8).

**Table 8: The unique taxa and number of contigs at order level for dataset "simLC,  $\geq 10$  reads, phrap"**

| ID  | Taxonomic name     | Number of contigs |
|-----|--------------------|-------------------|
| A1  | Rhizobiales        | 428               |
| A2  | Sphingobacteriales | 23                |
| A3  | Xanthomonadales    | 16                |
| A4  | Desulfuromonadales | 2                 |
| A5  | Chroococcales      | 7                 |
| A6  | Methylophilales    | 1                 |
| A7  | Alteromonadales    | 1                 |
| A8  | Lactobacillales    | 1                 |
| A9  | Pseudomonadales    | 1                 |
| A10 | Burkholderiales    | 1                 |
| A11 | Thermoplasmatales  | 1                 |

3. We use the predicted taxa of contigs (D) for different binning methods to match the contig\_ID in ActualContigTaxa file. Additionally, we use the NCBI database to determine the taxonomy of the predicted taxa names. For example, a contig is predicted to be of taxon Rhizobiales, using NCBI database it is known to be at the order level, as well as all its higher rank (kingdom, phylum, class) taxonomic names. In the same example as above, 478 out of 482 contigs are assigned a predicted taxon by the “gen PhyloPythia p=0.5”. However,

some contigs can be predicted to be of a taxon that is not in the list of actual taxa.

- The contigs that were predicted at or below the specified taxonomic level of comparison are identified. The number of contigs for each taxon is counted and placed into a contingency table with the actual taxa as the row and the predicted taxa as the column names. E.g. in the above example, out of 482 contigs in SimLC dataset that has  $\geq 10$  reads, there were 369 contigs predicted at the order level or below. However, within these 369 contigs, 1 contig has the order taxonomic label that is not in the 11 actual taxa so it was treated as unassigned. Therefore, **only 368 contigs were binned**. The exact contig count for each actual taxa and for each predicted taxa are shown in the following contingency table:

|     | P1  | P2 | P3 | P4 | P5 | P6 | P7 | P8 | P9 | P10 | P11 | UnAsgn | Sum   | Sp     | Sn     |  |
|-----|-----|----|----|----|----|----|----|----|----|-----|-----|--------|-------|--------|--------|--|
| A1  | 350 | 0  | 0  | 0  | 0  | 0  | 0  | 0  | 0  | 0   | 0   | 78     | 428   | 1      | 0.8177 |  |
| A2  | 0   | 0  | 0  | 0  | 0  | 0  | 0  | 0  | 0  | 0   | 0   | 23     | 23    | 1      | 0      |  |
| A3  | 0   | 0  | 15 | 0  | 0  | 0  | 0  | 0  | 0  | 0   | 0   | 1      | 16    | 0.9978 | 0.9375 |  |
| A4  | 0   | 0  | 0  | 1  | 0  | 0  | 0  | 0  | 1  | 0   | 0   | 0      | 2     | 1      | 0.5    |  |
| A5  | 0   | 0  | 0  | 0  | 0  | 0  | 0  | 0  | 0  | 0   | 0   | 7      | 7     | 1      | 0      |  |
| A6  | 0   | 0  | 0  | 0  | 0  | 0  | 0  | 0  | 0  | 0   | 0   | 1      | 1     | 1      | 0      |  |
| A7  | 0   | 0  | 0  | 0  | 0  | 0  | 0  | 0  | 0  | 0   | 0   | 1      | 1     | 1      | 0      |  |
| A8  | 0   | 0  | 0  | 0  | 0  | 0  | 0  | 0  | 0  | 0   | 0   | 1      | 1     | 1      | 0      |  |
| A9  | 0   | 0  | 0  | 0  | 0  | 0  | 0  | 0  | 0  | 0   | 0   | 1      | 1     | 0.9979 | 0      |  |
| A10 | 0   | 0  | 1  | 0  | 0  | 0  | 0  | 0  | 0  | 0   | 0   | 0      | 1     | 1      | 0      |  |
| A11 | 0   | 0  | 0  | 0  | 0  | 0  | 0  | 0  | 0  | 0   | 0   | 1      | 1     | 1      | 0      |  |
|     |     |    |    |    |    |    |    |    |    |     |     |        | Total | 482    |        |  |

where:

Ax represents an actual taxon in dataset. The corresponding taxon name can be found in Table 8.

Px has the same name as the corresponding Ax but representing the predicted taxon.

UnAsgn column is the number of contigs that are not assigned by this method at the given taxa level.

Sp is the specificity for the corresponding class

Sn is the sensitivity for the corresponding class

Since only P1, P3, P4 and P9 contain predicted contigs, so **the number of bins is 4**.



5. Finally, the weighted specificity (wSp) and sensitivity (wSn) can be calculated by:

$$wSp = \frac{428}{482} \times 1 + \frac{23}{482} \times 1 + \frac{16}{482} \times 0.9978 + \dots$$

$$wSp = 0.9999$$

$$wSn = \frac{428}{482} \times 0.8177 + \frac{23}{482} \times 0 + \frac{16}{482} \times 0.9375 + \dots$$

$$wSn = 0.7593$$

The following shows the links in FAMeS to download the mentioned files:

(A): ContigReads.txt.gz:

[ftp://ftp.jgi-psf.org/pub/JGI\\_data/kmavromm/fames/Assemblies/ContigReads.txt.gz](ftp://ftp.jgi-psf.org/pub/JGI_data/kmavromm/fames/Assemblies/ContigReads.txt.gz)

(B): Different files for different datasets were from the 'Assemblers' section in:

[http://fames.jgi-psf.org/Retrieve\\_data.html](http://fames.jgi-psf.org/Retrieve_data.html)

(C): contig\_assignment.txt.gz:

[ftp://ftp.jgi-psf.org/pub/JGI\\_data/kmavromm/fames/Assemblies/contig\\_assignment.txt.gz](ftp://ftp.jgi-psf.org/pub/JGI_data/kmavromm/fames/Assemblies/contig_assignment.txt.gz)

(D): Predicted taxonomic results were from the 'Binning Methods' section in:

[http://fames.jgi-psf.org/Retrieve\\_data.html](http://fames.jgi-psf.org/Retrieve_data.html)

## 6. Result comparisons of different methods at different taxonomic level for the simulated benchmark datasets

Each of the following tables compares the binning methods for different datasets of complexity (simLC & simMC), different assembler (Arachne & Phrap), different types of datasets ( $\geq 8$  kb &  $\geq 10$  reads) at different taxonomic levels (family, order and class).

The following short forms are used in the tables:

- Total#Contigs: Total number of contigs in the dataset
- %ofBinContigs: The percentage of contigs binned
- #PredNotInAct: The number of contigs predicted as a taxon that is not present in the dataset, which are treated as the un-binned contigs
- wSp: Weighted specificity
- wSn: Weighted sensitivity.

The method with the highest values of wSp and wSn are shown in bold font in the tables.

***i. Family level, >=8 kb, simLC***

| Assembler      | Method                         | Bins     | BinnedContigs | Total#Contigs | %ofBinContigs | #PredNotInAct | aSp          | wSp          | aSn          | wSn          |
|----------------|--------------------------------|----------|---------------|---------------|---------------|---------------|--------------|--------------|--------------|--------------|
| Arachne        | kmer (7mer)                    | 0        | 0             | 202           | 0             | 85            | -            | -            | 0.000        | 0.000        |
| Arachne        | kmer (8mer)                    | 0        | 0             | 202           | 0             | 148           | -            | -            | 0.000        | 0.000        |
| Arachne        | BLAST distr 1                  | 0        | 0             | 202           | 0             | 0             | -            | -            | 0.000        | 0.000        |
| Arachne        | BLAST distr 2                  | 0        | 0             | 202           | 0             | 0             | -            | -            | 0.000        | 0.000        |
| Arachne        | S-GSOM (CP=55%)                | 1        | 141           | 202           | 69.8          | 0             | 1.000        | 1.000        | 0.698        | 0.698        |
| Arachne        | gen PhyloPythia (p:0.85)       | 0        | 0             | 202           | 0             | 0             | -            | -            | 0.000        | 0.000        |
| Arachne        | ssp PhyloPythia (p:0.85)       | 1        | 114           | 202           | 56.44         | 0             | 1.000        | 1.000        | 0.564        | 0.564        |
| Arachne        | S-GSOM (CP=75%)                | 1        | 180           | 202           | 89.11         | 0             | 1.000        | 1.000        | 0.891        | 0.891        |
| Arachne        | gen PhyloPythia (p:0.5)        | 0        | 0             | 202           | 0             | 0             | -            | -            | 0.000        | 0.000        |
| <b>Arachne</b> | <b>ssp PhyloPythia (p:0.5)</b> | <b>1</b> | <b>192</b>    | <b>202</b>    | <b>95.05</b>  | <b>0</b>      | <b>1.000</b> | <b>1.000</b> | <b>0.950</b> | <b>0.950</b> |
| Phrap          | kmer (7mer)                    | 0        | 0             | 229           | 0             | 129           | -            | -            | 0.000        | 0.000        |
| Phrap          | kmer (8mer)                    | 0        | 0             | 229           | 0             | 154           | -            | -            | 0.000        | 0.000        |
| Phrap          | BLAST distr 1                  | 0        | 0             | 229           | 0             | 0             | -            | -            | 0.000        | 0.000        |
| Phrap          | BLAST distr 2                  | 0        | 0             | 229           | 0             | 0             | -            | -            | 0.000        | 0.000        |
| Phrap          | S-GSOM (CP=55%)                | 1        | 157           | 229           | 68.56         | 0             | 1.000        | 1.000        | 0.686        | 0.686        |
| Phrap          | gen PhyloPythia (p:0.85)       | 0        | 0             | 229           | 0             | 0             | -            | -            | 0.000        | 0.000        |
| Phrap          | ssp PhyloPythia (p:0.85)       | 1        | 178           | 229           | 77.73         | 0             | 1.000        | 1.000        | 0.777        | 0.777        |
| Phrap          | S-GSOM (CP=75%)                | 1        | 204           | 229           | 89.08         | 0             | 1.000        | 1.000        | 0.891        | 0.891        |
| Phrap          | gen PhyloPythia (p:0.5)        | 0        | 0             | 229           | 0             | 0             | -            | -            | 0.000        | 0.000        |
| <b>Phrap</b>   | <b>ssp PhyloPythia (p:0.5)</b> | <b>1</b> | <b>216</b>    | <b>229</b>    | <b>94.32</b>  | <b>0</b>      | <b>1.000</b> | <b>1.000</b> | <b>0.943</b> | <b>0.943</b> |

**ii. Family level, >=8 kb, simMC**

| Assembler      | Method                   | Bins     | BinnedContigs | Total#Contigs | %ofBinContigs | #PredNotInAct | aSp          | wSp          | aSn          | wSn          |
|----------------|--------------------------|----------|---------------|---------------|---------------|---------------|--------------|--------------|--------------|--------------|
| Arachne        | kmer (7mer)              | 0        | 0             | 301           | 0             | 47            | -            | -            | 0.000        | 0.000        |
| Arachne        | kmer (8mer)              | 0        | 0             | 301           | 0             | 191           | -            | -            | 0.000        | 0.000        |
| Arachne        | BLAST distr 1            | 0        | 0             | 301           | 0             | 0             | -            | -            | 0.000        | 0.000        |
| Arachne        | BLAST distr 2            | 0        | 0             | 301           | 0             | 0             | -            | -            | 0.000        | 0.000        |
| Arachne        | S-GSOM (CP=55%)          | 2        | 220           | 301           | 73.09         | 0             | 1.000        | 1.000        | 0.618        | 0.731        |
| Arachne        | gen PhyloPythia (p:0.85) | 0        | 0             | 301           | 0             | 0             | -            | -            | 0.000        | 0.000        |
| Arachne        | ssp PhyloPythia (p:0.85) | 2        | 18            | 301           | 5.98          | 0             | 1.000        | 1.000        | 0.067        | 0.060        |
| <b>Arachne</b> | <b>S-GSOM (CP=75%)</b>   | <b>2</b> | <b>279</b>    | <b>301</b>    | <b>92.69</b>  | <b>0</b>      | <b>1.000</b> | <b>1.000</b> | <b>0.890</b> | <b>0.927</b> |
| Arachne        | gen PhyloPythia (p:0.5)  | 0        | 0             | 301           | 0             | 0             | -            | -            | 0.000        | 0.000        |
| Arachne        | ssp PhyloPythia (p:0.5)  | 2        | 143           | 301           | 47.51         | 0             | 1.000        | 1.000        | 0.401        | 0.475        |
| Phrap          | kmer (7mer)              | 0        | 0             | 401           | 0             | 84            | -            | -            | 0.000        | 0.000        |
| Phrap          | kmer (8mer)              | 0        | 0             | 401           | 0             | 271           | -            | -            | 0.000        | 0.000        |
| Phrap          | BLAST distr 1            | 0        | 0             | 401           | 0             | 0             | -            | -            | 0.000        | 0.000        |
| Phrap          | BLAST distr 2            | 0        | 0             | 401           | 0             | 0             | -            | -            | 0.000        | 0.000        |
| Phrap          | S-GSOM (CP=55%)          | 2        | 318           | 401           | 79.3          | 0             | 1.000        | 1.000        | 0.611        | 0.793        |
| Phrap          | gen PhyloPythia (p:0.85) | 0        | 0             | 401           | 0             | 0             | -            | -            | 0.000        | 0.000        |
| Phrap          | ssp PhyloPythia (p:0.85) | 2        | 73            | 401           | 18.2          | 0             | 1.000        | 1.000        | 0.323        | 0.182        |
| <b>Phrap</b>   | <b>S-GSOM (CP=75%)</b>   | <b>2</b> | <b>367</b>    | <b>401</b>    | <b>91.52</b>  | <b>0</b>      | <b>1.000</b> | <b>1.000</b> | <b>0.841</b> | <b>0.915</b> |
| Phrap          | gen PhyloPythia (p:0.5)  | 0        | 0             | 401           | 0             | 0             | -            | -            | 0.000        | 0.000        |
| Phrap          | ssp PhyloPythia (p:0.5)  | 2        | 87            | 401           | 21.7          | 0             | 1.000        | 1.000        | 0.371        | 0.217        |

**iii. Family level, >=10 reads, simLC**

| Assembler      | Method                   | Bins     | BinnedContigs | Total#Contigs | %ofBinContigs | #PredNotInAct | aSp          | wSp          | aSn          | wSn          |
|----------------|--------------------------|----------|---------------|---------------|---------------|---------------|--------------|--------------|--------------|--------------|
| Arachne        | kmer (7mer)              | 0        | 0             | 367           | 0             | 168           | -            | -            | 0.000        | 0.000        |
| Arachne        | kmer (8mer)              | 0        | 0             | 367           | 0             | 305           | -            | -            | 0.000        | 0.000        |
| Arachne        | BLAST distr 1            | 0        | 0             | 367           | 0             | 0             | -            | -            | 0.000        | 0.000        |
| Arachne        | BLAST distr 2            | 0        | 0             | 367           | 0             | 0             | -            | -            | 0.000        | 0.000        |
| Arachne        | S-GSOM (CP=55%)          | 3        | 295           | 367           | 80.38         | 0             | 0.999        | 1.000        | 0.168        | 0.798        |
| Arachne        | gen PhyloPythia (p:0.85) | 0        | 0             | 367           | 0             | 0             | -            | -            | 0.000        | 0.000        |
| Arachne        | ssp PhyloPythia (p:0.85) | 1        | 116           | 367           | 31.61         | 0             | 1.000        | 1.000        | 0.067        | 0.316        |
| <b>Arachne</b> | <b>S-GSOM (CP=75%)</b>   | <b>3</b> | <b>343</b>    | <b>367</b>    | <b>93.46</b>  | <b>0</b>      | <b>0.988</b> | <b>0.950</b> | <b>0.195</b> | <b>0.926</b> |
| Arachne        | gen PhyloPythia (p:0.5)  | 0        | 0             | 367           | 0             | 0             | -            | -            | 0.000        | 0.000        |
| Arachne        | ssp PhyloPythia (p:0.5)  | 1        | 209           | 367           | 56.95         | 0             | 1.000        | 1.000        | 0.120        | 0.569        |
| Phrap          | kmer (7mer)              | 0        | 0             | 482           | 0             | 162           | -            | -            | 0.000        | 0.000        |
| Phrap          | kmer (8mer)              | 2        | 6             | 482           | 1.24          | 292           | 0.999        | 1.000        | 0.000        | 0.000        |
| Phrap          | BLAST distr 1            | 0        | 0             | 482           | 0             | 0             | -            | -            | 0.000        | 0.000        |
| Phrap          | BLAST distr 2            | 0        | 0             | 482           | 0             | 0             | -            | -            | 0.000        | 0.000        |
| Phrap          | S-GSOM (CP=55%)          | 9        | 381           | 482           | 79.05         | 9             | 0.995        | 1.000        | 0.084        | 0.728        |
| Phrap          | gen PhyloPythia (p:0.85) | 0        | 0             | 482           | 0             | 0             | -            | -            | 0.000        | 0.000        |
| Phrap          | ssp PhyloPythia (p:0.85) | 2        | 199           | 482           | 41.29         | 0             | 1.000        | 1.000        | 0.039        | 0.411        |
| <b>Phrap</b>   | <b>S-GSOM (CP=75%)</b>   | <b>9</b> | <b>443</b>    | <b>482</b>    | <b>91.91</b>  | <b>9</b>      | <b>0.993</b> | <b>1.000</b> | <b>0.132</b> | <b>0.840</b> |
| Phrap          | gen PhyloPythia (p:0.5)  | 0        | 0             | 482           | 0             | 0             | -            | -            | 0.000        | 0.000        |
| Phrap          | ssp PhyloPythia (p:0.5)  | 3        | 300           | 482           | 62.24         | 0             | 1.000        | 1.000        | 0.062        | 0.620        |

**iv. Family level, >=10 reads, simMC**

| Assembler      | Method                   | Bins      | BinnedContigs | Total#Contigs | %ofBinContigs | #PredNotInAct | aSp          | wSp          | aSn          | wSn          |
|----------------|--------------------------|-----------|---------------|---------------|---------------|---------------|--------------|--------------|--------------|--------------|
| Arachne        | kmer (7mer)              | 1         | 2             | 1372          | 0.15          | 132           | 1.000        | 1.000        | 0.000        | 0.000        |
| Arachne        | kmer (8mer)              | 0         | 0             | 1372          | 0             | 1241          | -            | -            | 0.000        | 0.000        |
| Arachne        | BLAST distr 1            | 0         | 0             | 1372          | 0             | 0             | -            | -            | 0.000        | 0.000        |
| Arachne        | BLAST distr 2            | 0         | 0             | 1372          | 0             | 0             | -            | -            | 0.000        | 0.000        |
| Arachne        | S-GSOM (CP=55%)          | 5         | 1061          | 1372          | 77.33         | 0             | 0.999        | 0.998        | 0.454        | 0.768        |
| Arachne        | gen PhyloPythia (p:0.85) | 0         | 0             | 1372          | 0             | 0             | -            | -            | 0.000        | 0.000        |
| Arachne        | ssp PhyloPythia (p:0.85) | 2         | 190           | 1372          | 13.85         | 0             | 1.000        | 1.000        | 0.045        | 0.138        |
| <b>Arachne</b> | <b>S-GSOM (CP=75%)</b>   | <b>5</b>  | <b>1253</b>   | <b>1372</b>   | <b>91.33</b>  | <b>0</b>      | <b>0.995</b> | <b>0.983</b> | <b>0.539</b> | <b>0.897</b> |
| Arachne        | gen PhyloPythia (p:0.5)  | 0         | 0             | 1372          | 0             | 0             | -            | -            | 0.000        | 0.000        |
| Arachne        | ssp PhyloPythia (p:0.5)  | 2         | 673           | 1372          | 49.05         | 0             | 1.000        | 1.000        | 0.141        | 0.491        |
| Phrap          | kmer (7mer)              | 1         | 1             | 1980          | 0.05          | 148           | 1.000        | 1.000        | 0.000        | 0.000        |
| Phrap          | kmer (8mer)              | 1         | 53            | 1980          | 2.68          | 1795          | 0.998        | 1.000        | 0.000        | 0.000        |
| Phrap          | BLAST distr 1            | 0         | 0             | 1980          | 0             | 0             | -            | -            | 0.000        | 0.000        |
| Phrap          | BLAST distr 2            | 0         | 0             | 1980          | 0             | 0             | -            | -            | 0.000        | 0.000        |
| Phrap          | S-GSOM (CP=55%)          | 10        | 1409          | 1980          | 71.16         | 9             | 0.997        | 0.995        | 0.160        | 0.686        |
| Phrap          | gen PhyloPythia (p:0.85) | 0         | 0             | 1980          | 0             | 0             | -            | -            | 0.000        | 0.000        |
| Phrap          | ssp PhyloPythia (p:0.85) | 2         | 172           | 1980          | 8.69          | 0             | 1.000        | 1.000        | 0.018        | 0.087        |
| <b>Phrap</b>   | <b>S-GSOM (CP=75%)</b>   | <b>10</b> | <b>1708</b>   | <b>1980</b>   | <b>86.26</b>  | <b>9</b>      | <b>0.995</b> | <b>0.991</b> | <b>0.195</b> | <b>0.816</b> |
| Phrap          | gen PhyloPythia (p:0.5)  | 0         | 0             | 1980          | 0             | 0             | -            | -            | 0.000        | 0.000        |
| Phrap          | ssp PhyloPythia (p:0.5)  | 2         | 367           | 1980          | 18.54         | 0             | 1.000        | 1.000        | 0.035        | 0.185        |

**v. Order level, >=8 kb, simLC**

| Assembler      | Method                         | Bins     | BinnedContigs | Total#Contigs | %ofBinContigs | #PredNotInAct | aSp          | wSp          | aSn          | wSn          |
|----------------|--------------------------------|----------|---------------|---------------|---------------|---------------|--------------|--------------|--------------|--------------|
| Arachne        | kmer (7mer)                    | 0        | 0             | 202           | 0             | 85            | -            | -            | 0.000        | 0.000        |
| Arachne        | kmer (8mer)                    | 0        | 0             | 202           | 0             | 149           | -            | -            | 0.000        | 0.000        |
| Arachne        | BLAST distr 1                  | 0        | 0             | 202           | 0             | 0             | -            | -            | 0.000        | 0.000        |
| Arachne        | BLAST distr 2                  | 0        | 0             | 202           | 0             | 0             | -            | -            | 0.000        | 0.000        |
| Arachne        | S-GSOM (CP=55%)                | 1        | 141           | 202           | 69.8          | 0             | 1.000        | 1.000        | 0.698        | 0.698        |
| Arachne        | gen PhyloPythia (p:0.85)       | 1        | 168           | 202           | 83.17         | 0             | 1.000        | 1.000        | 0.832        | 0.832        |
| Arachne        | ssp PhyloPythia (p:0.85)       | 1        | 186           | 202           | 92.08         | 0             | 1.000        | 1.000        | 0.921        | 0.921        |
| Arachne        | S-GSOM (CP=75%)                | 1        | 180           | 202           | 89.11         | 0             | 1.000        | 1.000        | 0.891        | 0.891        |
| <b>Arachne</b> | <b>gen PhyloPythia (p:0.5)</b> | <b>1</b> | <b>201</b>    | <b>202</b>    | <b>99.5</b>   | <b>0</b>      | <b>1.000</b> | <b>1.000</b> | <b>0.995</b> | <b>0.995</b> |
| <b>Arachne</b> | <b>ssp PhyloPythia (p:0.5)</b> | <b>1</b> | <b>201</b>    | <b>202</b>    | <b>99.5</b>   | <b>0</b>      | <b>1.000</b> | <b>1.000</b> | <b>0.995</b> | <b>0.995</b> |
| Phrap          | kmer (7mer)                    | 0        | 0             | 229           | 0             | 129           | -            | -            | 0.000        | 0.000        |
| Phrap          | kmer (8mer)                    | 0        | 0             | 229           | 0             | 154           | -            | -            | 0.000        | 0.000        |
| Phrap          | BLAST distr 1                  | 0        | 0             | 229           | 0             | 0             | -            | -            | 0.000        | 0.000        |
| Phrap          | BLAST distr 2                  | 0        | 0             | 229           | 0             | 0             | -            | -            | 0.000        | 0.000        |
| Phrap          | S-GSOM (CP=55%)                | 1        | 157           | 229           | 68.56         | 0             | 1.000        | 1.000        | 0.686        | 0.686        |
| Phrap          | gen PhyloPythia (p:0.85)       | 1        | 185           | 229           | 80.79         | 0             | 1.000        | 1.000        | 0.808        | 0.808        |
| Phrap          | ssp PhyloPythia (p:0.85)       | 1        | 205           | 229           | 89.52         | 0             | 1.000        | 1.000        | 0.895        | 0.895        |
| Phrap          | S-GSOM (CP=75%)                | 1        | 204           | 229           | 89.08         | 0             | 1.000        | 1.000        | 0.891        | 0.891        |
| <b>Phrap</b>   | <b>gen PhyloPythia (p:0.5)</b> | <b>1</b> | <b>227</b>    | <b>229</b>    | <b>99.13</b>  | <b>0</b>      | <b>1.000</b> | <b>1.000</b> | <b>0.991</b> | <b>0.991</b> |
| <b>Phrap</b>   | <b>ssp PhyloPythia (p:0.5)</b> | <b>1</b> | <b>227</b>    | <b>229</b>    | <b>99.13</b>  | <b>0</b>      | <b>1.000</b> | <b>1.000</b> | <b>0.991</b> | <b>0.991</b> |

**vi. Order level, >=8 kb, simMC**

| Assembler      | Method                         | Bins     | BinnedContigs | Total#Contigs | %ofBinContigs | #PredNotInAct | aSp          | wSp          | aSn          | wSn          |
|----------------|--------------------------------|----------|---------------|---------------|---------------|---------------|--------------|--------------|--------------|--------------|
| Arachne        | kmer (7mer)                    | 0        | 0             | 301           | 0             | 47            | -            | -            | 0.000        | 0.000        |
| Arachne        | kmer (8mer)                    | 0        | 0             | 301           | 0             | 191           | -            | -            | 0.000        | 0.000        |
| Arachne        | BLAST distr 1                  | 0        | 0             | 301           | 0             | 0             | -            | -            | 0.000        | 0.000        |
| Arachne        | BLAST distr 2                  | 0        | 0             | 301           | 0             | 0             | -            | -            | 0.000        | 0.000        |
| Arachne        | S-GSOM (CP=55%)                | 2        | 220           | 301           | 73.09         | 0             | 1.000        | 1.000        | 0.618        | 0.731        |
| Arachne        | gen PhyloPythia (p:0.85)       | 2        | 242           | 301           | 80.4          | 0             | 1.000        | 1.000        | 0.838        | 0.804        |
| Arachne        | ssp PhyloPythia (p:0.85)       | 2        | 242           | 301           | 80.4          | 0             | 1.000        | 1.000        | 0.841        | 0.804        |
| Arachne        | S-GSOM (CP=75%)                | 2        | 279           | 301           | 92.69         | 0             | 1.000        | 1.000        | 0.890        | 0.927        |
| <b>Arachne</b> | <b>gen PhyloPythia (p:0.5)</b> | <b>2</b> | <b>301</b>    | <b>301</b>    | <b>100</b>    | <b>0</b>      | <b>1.000</b> | <b>1.000</b> | <b>1.000</b> | <b>1.000</b> |
| <b>Arachne</b> | <b>ssp PhyloPythia (p:0.5)</b> | <b>2</b> | <b>301</b>    | <b>301</b>    | <b>100</b>    | <b>0</b>      | <b>1.000</b> | <b>1.000</b> | <b>1.000</b> | <b>1.000</b> |
| Phrap          | kmer (7mer)                    | 0        | 0             | 401           | 0             | 84            | -            | -            | 0.000        | 0.000        |
| Phrap          | kmer (8mer)                    | 0        | 0             | 401           | 0             | 271           | -            | -            | 0.000        | 0.000        |
| Phrap          | BLAST distr 1                  | 0        | 0             | 401           | 0             | 0             | -            | -            | 0.000        | 0.000        |
| Phrap          | BLAST distr 2                  | 0        | 0             | 401           | 0             | 0             | -            | -            | 0.000        | 0.000        |
| Phrap          | S-GSOM (CP=55%)                | 2        | 318           | 401           | 79.3          | 0             | 1.000        | 1.000        | 0.611        | 0.793        |
| Phrap          | gen PhyloPythia (p:0.85)       | 2        | 301           | 401           | 75.06         | 0             | 1.000        | 1.000        | 0.803        | 0.751        |
| Phrap          | ssp PhyloPythia (p:0.85)       | 2        | 295           | 401           | 73.57         | 0             | 1.000        | 1.000        | 0.787        | 0.736        |
| Phrap          | S-GSOM (CP=75%)                | 2        | 367           | 401           | 91.52         | 0             | 1.000        | 1.000        | 0.841        | 0.915        |
| <b>Phrap</b>   | <b>gen PhyloPythia (p:0.5)</b> | <b>2</b> | <b>399</b>    | <b>401</b>    | <b>99.5</b>   | <b>1</b>      | <b>1.000</b> | <b>1.000</b> | <b>0.997</b> | <b>0.995</b> |
| <b>Phrap</b>   | <b>ssp PhyloPythia (p:0.5)</b> | <b>2</b> | <b>399</b>    | <b>401</b>    | <b>99.5</b>   | <b>1</b>      | <b>1.000</b> | <b>1.000</b> | <b>0.997</b> | <b>0.995</b> |



**vii. Order level, >=10 reads, simLC**

| Assembler      | Method                   | Bins     | BinnedContigs | Total#Contigs | %ofBinContigs | #PredNotInAct | aSp          | wSp          | aSn          | wSn          |
|----------------|--------------------------|----------|---------------|---------------|---------------|---------------|--------------|--------------|--------------|--------------|
| Arachne        | kmer (7mer)              | 0        | 0             | 367           | 0             | 168           | -            | -            | 0.000        | 0.000        |
| Arachne        | kmer (8mer)              | 0        | 0             | 367           | 0             | 312           | -            | -            | 0.000        | 0.000        |
| Arachne        | BLAST distr 1            | 0        | 0             | 367           | 0             | 0             | -            | -            | 0.000        | 0.000        |
| Arachne        | BLAST distr 2            | 0        | 0             | 367           | 0             | 0             | -            | -            | 0.000        | 0.000        |
| Arachne        | S-GSOM (CP=55%)          | 3        | 295           | 367           | 80.38         | 0             | 0.999        | 1.000        | 0.168        | 0.798        |
| Arachne        | gen PhyloPythia (p:0.85) | 2        | 214           | 367           | 58.31         | 0             | 1.000        | 1.000        | 0.207        | 0.583        |
| Arachne        | ssp PhyloPythia (p:0.85) | 2        | 236           | 367           | 64.31         | 0             | 0.999        | 1.000        | 0.218        | 0.638        |
| <b>Arachne</b> | <b>S-GSOM (CP=75%)</b>   | <b>3</b> | <b>343</b>    | <b>367</b>    | <b>93.46</b>  | <b>0</b>      | <b>0.988</b> | <b>0.950</b> | <b>0.195</b> | <b>0.926</b> |
| Arachne        | gen PhyloPythia (p:0.5)  | 2        | 292           | 367           | 79.56         | 0             | 1.000        | 1.000        | 0.308        | 0.796        |
| Arachne        | ssp PhyloPythia (p:0.5)  | 2        | 296           | 367           | 80.65         | 0             | 0.998        | 1.000        | 0.308        | 0.798        |
| Phrap          | kmer (7mer)              | 2        | 3             | 482           | 0.62          | 159           | 0.999        | 1.000        | 0.000        | 0.000        |
| Phrap          | kmer (8mer)              | 3        | 17            | 482           | 3.53          | 281           | 0.997        | 1.000        | 0.000        | 0.000        |
| Phrap          | BLAST distr 1            | 0        | 0             | 482           | 0             | 0             | -            | -            | 0.000        | 0.000        |
| Phrap          | BLAST distr 2            | 0        | 0             | 482           | 0             | 1             | -            | -            | 0.000        | 0.000        |
| Phrap          | S-GSOM (CP=55%)          | 8        | 381           | 482           | 79.05         | 9             | 0.994        | 1.000        | 0.091        | 0.728        |
| Phrap          | gen PhyloPythia (p:0.85) | 3        | 236           | 482           | 48.96         | 0             | 1.000        | 1.000        | 0.105        | 0.488        |
| Phrap          | ssp PhyloPythia (p:0.85) | 3        | 272           | 482           | 56.43         | 0             | 1.000        | 1.000        | 0.112        | 0.560        |
| <b>Phrap</b>   | <b>S-GSOM (CP=75%)</b>   | <b>8</b> | <b>443</b>    | <b>482</b>    | <b>91.91</b>  | <b>9</b>      | <b>0.993</b> | <b>1.000</b> | <b>0.144</b> | <b>0.840</b> |
| Phrap          | gen PhyloPythia (p:0.5)  | 4        | 368           | 482           | 76.35         | 1             | 1.000        | 1.000        | 0.205        | 0.759        |
| Phrap          | ssp PhyloPythia (p:0.5)  | 5        | 387           | 482           | 80.29         | 1             | 0.999        | 1.000        | 0.213        | 0.797        |

**viii. Order level,  $\geq 10$  reads, simMC**

| Assembler      | Method                   | Bins     | BinnedContigs | Total#Contigs | %ofBinContigs | #PredNotInAct | aSp          | wSp          | aSn          | wSn          |
|----------------|--------------------------|----------|---------------|---------------|---------------|---------------|--------------|--------------|--------------|--------------|
| Arachne        | kmer (7mer)              | 1        | 2             | 1372          | 0.15          | 133           | 1.000        | 1.000        | 0.000        | 0.000        |
| Arachne        | kmer (8mer)              | 0        | 0             | 1372          | 0             | 1241          | -            | -            | 0.000        | 0.000        |
| Arachne        | BLAST distr 1            | 0        | 0             | 1372          | 0             | 0             | -            | -            | 0.000        | 0.000        |
| Arachne        | BLAST distr 2            | 0        | 0             | 1372          | 0             | 1             | -            | -            | 0.000        | 0.000        |
| Arachne        | S-GSOM (CP=55%)          | 5        | 1061          | 1372          | 77.33         | 0             | 0.999        | 0.998        | 0.454        | 0.768        |
| Arachne        | gen PhyloPythia (p:0.85) | 3        | 562           | 1372          | 40.96         | 0             | 1.000        | 1.000        | 0.156        | 0.409        |
| Arachne        | ssp PhyloPythia (p:0.85) | 3        | 657           | 1372          | 47.89         | 0             | 1.000        | 1.000        | 0.173        | 0.478        |
| <b>Arachne</b> | <b>S-GSOM (CP=75%)</b>   | <b>5</b> | <b>1253</b>   | <b>1372</b>   | <b>91.33</b>  | <b>0</b>      | <b>0.995</b> | <b>0.983</b> | <b>0.539</b> | <b>0.897</b> |
| Arachne        | gen PhyloPythia (p:0.5)  | 4        | 1036          | 1372          | 75.51         | 6             | 1.000        | 1.000        | 0.417        | 0.753        |
| Arachne        | ssp PhyloPythia (p:0.5)  | 4        | 1102          | 1372          | 80.32         | 4             | 1.000        | 1.000        | 0.428        | 0.802        |
| Phrap          | kmer (7mer)              | 1        | 1             | 1980          | 0.05          | 163           | 1.000        | 1.000        | 0.000        | 0.000        |
| Phrap          | kmer (8mer)              | 2        | 391           | 1980          | 19.75         | 1457          | 0.980        | 1.000        | 0.000        | 0.000        |
| Phrap          | BLAST distr 1            | 0        | 0             | 1980          | 0             | 2             | -            | -            | 0.000        | 0.000        |
| Phrap          | BLAST distr 2            | 0        | 0             | 1980          | 0             | 3             | -            | -            | 0.000        | 0.000        |
| Phrap          | S-GSOM (CP=55%)          | 8        | 1409          | 1980          | 71.16         | 9             | 0.997        | 0.995        | 0.175        | 0.686        |
| Phrap          | gen PhyloPythia (p:0.85) | 3        | 799           | 1980          | 40.35         | 1             | 1.000        | 1.000        | 0.101        | 0.404        |
| Phrap          | ssp PhyloPythia (p:0.85) | 3        | 844           | 1980          | 42.63         | 1             | 1.000        | 1.000        | 0.104        | 0.426        |
| <b>Phrap</b>   | <b>S-GSOM (CP=75%)</b>   | <b>8</b> | <b>1708</b>   | <b>1980</b>   | <b>86.26</b>  | <b>9</b>      | <b>0.994</b> | <b>0.991</b> | <b>0.218</b> | <b>0.816</b> |
| Phrap          | gen PhyloPythia (p:0.5)  | 5        | 1484          | 1980          | 74.95         | 6             | 1.000        | 1.000        | 0.204        | 0.745        |
| Phrap          | ssp PhyloPythia (p:0.5)  | 5        | 1524          | 1980          | 76.97         | 4             | 1.000        | 1.000        | 0.208        | 0.767        |

**ix. Class level, >=8 kb, simLC**

| Assembler      | Method                         | Bins     | BinnedContigs | Total#Contigs | %ofBinContigs | #PredNotInAct | aSp          | wSp          | aSn          | wSn          |
|----------------|--------------------------------|----------|---------------|---------------|---------------|---------------|--------------|--------------|--------------|--------------|
| Arachne        | kmer (7mer)                    | 1        | 82            | 202           | 40.59         | 120           | 1.000        | 1.000        | 0.406        | 0.406        |
| Arachne        | kmer (8mer)                    | 1        | 27            | 202           | 13.37         | 175           | 1.000        | 1.000        | 0.134        | 0.134        |
| Arachne        | BLAST distr 1                  | 1        | 149           | 202           | 73.76         | 27            | 1.000        | 1.000        | 0.738        | 0.738        |
| Arachne        | BLAST distr 2                  | 1        | 158           | 202           | 78.22         | 41            | 1.000        | 1.000        | 0.782        | 0.782        |
| Arachne        | S-GSOM (CP=55%)                | 1        | 141           | 202           | 69.8          | 0             | 1.000        | 1.000        | 0.698        | 0.698        |
| Arachne        | gen PhyloPythia (p:0.85)       | 1        | 194           | 202           | 96.04         | 0             | 1.000        | 1.000        | 0.960        | 0.960        |
| Arachne        | ssp PhyloPythia (p:0.85)       | 1        | 196           | 202           | 97.03         | 0             | 1.000        | 1.000        | 0.970        | 0.970        |
| Arachne        | S-GSOM (CP=75%)                | 1        | 180           | 202           | 89.11         | 0             | 1.000        | 1.000        | 0.891        | 0.891        |
| <b>Arachne</b> | <b>gen PhyloPythia (p:0.5)</b> | <b>1</b> | <b>201</b>    | <b>202</b>    | <b>99.5</b>   | <b>1</b>      | <b>1.000</b> | <b>1.000</b> | <b>0.995</b> | <b>0.995</b> |
| <b>Arachne</b> | <b>ssp PhyloPythia (p:0.5)</b> | <b>1</b> | <b>201</b>    | <b>202</b>    | <b>99.5</b>   | <b>1</b>      | <b>1.000</b> | <b>1.000</b> | <b>0.995</b> | <b>0.995</b> |
| Phrap          | kmer (7mer)                    | 1        | 129           | 229           | 56.33         | 100           | 1.000        | 1.000        | 0.563        | 0.563        |
| Phrap          | kmer (8mer)                    | 1        | 138           | 229           | 60.26         | 91            | 1.000        | 1.000        | 0.603        | 0.603        |
| Phrap          | BLAST distr 1                  | 1        | 164           | 229           | 71.62         | 29            | 1.000        | 1.000        | 0.716        | 0.716        |
| Phrap          | BLAST distr 2                  | 1        | 181           | 229           | 79.04         | 41            | 1.000        | 1.000        | 0.790        | 0.790        |
| Phrap          | S-GSOM (CP=55%)                | 1        | 157           | 229           | 68.56         | 0             | 1.000        | 1.000        | 0.686        | 0.686        |
| Phrap          | gen PhyloPythia (p:0.85)       | 1        | 219           | 229           | 95.63         | 0             | 1.000        | 1.000        | 0.956        | 0.956        |
| Phrap          | ssp PhyloPythia (p:0.85)       | 1        | 223           | 229           | 97.38         | 0             | 1.000        | 1.000        | 0.974        | 0.974        |
| Phrap          | S-GSOM (CP=75%)                | 1        | 204           | 229           | 89.08         | 0             | 1.000        | 1.000        | 0.891        | 0.891        |
| <b>Phrap</b>   | <b>gen PhyloPythia (p:0.5)</b> | <b>1</b> | <b>228</b>    | <b>229</b>    | <b>99.56</b>  | <b>1</b>      | <b>1.000</b> | <b>1.000</b> | <b>0.996</b> | <b>0.996</b> |
| <b>Phrap</b>   | <b>ssp PhyloPythia (p:0.5)</b> | <b>1</b> | <b>228</b>    | <b>229</b>    | <b>99.56</b>  | <b>1</b>      | <b>1.000</b> | <b>1.000</b> | <b>0.996</b> | <b>0.996</b> |

**x. Class level, >=8 kb, simMC**

| Assembler      | Method                         | Bins     | BinnedContigs | Total#Contigs | %ofBinContigs | #PredNotInAct | aSp          | wSp          | aSn          | wSn          |
|----------------|--------------------------------|----------|---------------|---------------|---------------|---------------|--------------|--------------|--------------|--------------|
| Arachne        | kmer (7mer)                    | 1        | 47            | 301           | 15.61         | 254           | 1.000        | 1.000        | 0.117        | 0.156        |
| Arachne        | kmer (8mer)                    | 2        | 74            | 301           | 24.58         | 227           | 0.945        | 0.940        | 0.147        | 0.196        |
| Arachne        | BLAST distr 1                  | 2        | 255           | 301           | 84.72         | 11            | 0.935        | 0.957        | 0.801        | 0.761        |
| Arachne        | BLAST distr 2                  | 2        | 274           | 301           | 91.03         | 13            | 0.910        | 0.940        | 0.828        | 0.791        |
| Arachne        | S-GSOM (CP=55%)                | 2        | 220           | 301           | 73.09         | 0             | 1.000        | 1.000        | 0.618        | 0.731        |
| Arachne        | gen PhyloPythia (p:0.85)       | 2        | 296           | 301           | 98.34         | 0             | 1.000        | 1.000        | 0.983        | 0.983        |
| Arachne        | ssp PhyloPythia (p:0.85)       | 2        | 296           | 301           | 98.34         | 0             | 1.000        | 1.000        | 0.985        | 0.983        |
| Arachne        | S-GSOM (CP=75%)                | 2        | 279           | 301           | 92.69         | 0             | 1.000        | 1.000        | 0.890        | 0.927        |
| <b>Arachne</b> | <b>gen PhyloPythia (p:0.5)</b> | <b>2</b> | <b>301</b>    | <b>301</b>    | <b>100</b>    | <b>0</b>      | <b>1.000</b> | <b>1.000</b> | <b>1.000</b> | <b>1.000</b> |
| <b>Arachne</b> | <b>ssp PhyloPythia (p:0.5)</b> | <b>2</b> | <b>301</b>    | <b>301</b>    | <b>100</b>    | <b>0</b>      | <b>1.000</b> | <b>1.000</b> | <b>1.000</b> | <b>1.000</b> |
| Phrap          | kmer (7mer)                    | 1        | 81            | 401           | 20.2          | 320           | 1.000        | 1.000        | 0.137        | 0.202        |
| Phrap          | kmer (8mer)                    | 2        | 39            | 401           | 9.73          | 362           | 0.943        | 0.966        | 0.012        | 0.017        |
| Phrap          | BLAST distr 1                  | 2        | 324           | 401           | 80.8          | 17            | 0.943        | 0.970        | 0.776        | 0.723        |
| Phrap          | BLAST distr 2                  | 2        | 360           | 401           | 89.78         | 23            | 0.922        | 0.959        | 0.832        | 0.783        |
| Phrap          | S-GSOM (CP=55%)                | 2        | 318           | 401           | 79.3          | 0             | 1.000        | 1.000        | 0.611        | 0.793        |
| Phrap          | gen PhyloPythia (p:0.85)       | 2        | 387           | 401           | 96.51         | 0             | 1.000        | 1.000        | 0.973        | 0.965        |
| Phrap          | ssp PhyloPythia (p:0.85)       | 2        | 380           | 401           | 94.76         | 0             | 1.000        | 1.000        | 0.955        | 0.948        |
| Phrap          | S-GSOM (CP=75%)                | 2        | 367           | 401           | 91.52         | 0             | 1.000        | 1.000        | 0.841        | 0.915        |
| <b>Phrap</b>   | <b>gen PhyloPythia (p:0.5)</b> | <b>2</b> | <b>400</b>    | <b>401</b>    | <b>99.75</b>  | <b>0</b>      | <b>1.000</b> | <b>1.000</b> | <b>0.998</b> | <b>0.998</b> |
| <b>Phrap</b>   | <b>ssp PhyloPythia (p:0.5)</b> | <b>2</b> | <b>400</b>    | <b>401</b>    | <b>99.75</b>  | <b>0</b>      | <b>1.000</b> | <b>1.000</b> | <b>0.998</b> | <b>0.998</b> |

**xi. Class level, >=10 reads, simLC**

| Assembler      | Method                         | Bins     | BinnedContigs | Total#Contigs | %ofBinContigs | #PredNotInAct | aSp          | wSp          | aSn          | wSn          |
|----------------|--------------------------------|----------|---------------|---------------|---------------|---------------|--------------|--------------|--------------|--------------|
| Arachne        | kmer (7mer)                    | 1        | 93            | 367           | 25.34         | 274           | 1.000        | 1.000        | 0.053        | 0.253        |
| Arachne        | kmer (8mer)                    | 2        | 54            | 367           | 14.71         | 313           | 0.986        | 0.999        | 0.016        | 0.076        |
| Arachne        | BLAST distr 1                  | 3        | 281           | 367           | 76.57         | 6             | 0.971        | 0.998        | 0.271        | 0.621        |
| Arachne        | BLAST distr 2                  | 3        | 327           | 367           | 89.1          | 14            | 0.959        | 0.998        | 0.285        | 0.689        |
| Arachne        | S-GSOM (CP=55%)                | 3        | 295           | 367           | 80.38         | 0             | 0.999        | 1.000        | 0.168        | 0.798        |
| Arachne        | gen PhyloPythia (p:0.85)       | 3        | 283           | 367           | 77.11         | 1             | 0.997        | 1.000        | 0.272        | 0.757        |
| Arachne        | ssp PhyloPythia (p:0.85)       | 3        | 287           | 367           | 78.2          | 1             | 0.996        | 1.000        | 0.273        | 0.763        |
| <b>Arachne</b> | <b>S-GSOM (CP=75%)</b>         | <b>3</b> | <b>343</b>    | <b>367</b>    | <b>93.46</b>  | <b>0</b>      | <b>0.988</b> | <b>0.950</b> | <b>0.195</b> | <b>0.926</b> |
| <b>Arachne</b> | <b>gen PhyloPythia (p:0.5)</b> | <b>3</b> | <b>349</b>    | <b>367</b>    | <b>95.1</b>   | <b>1</b>      | <b>0.985</b> | <b>0.950</b> | <b>0.563</b> | <b>0.926</b> |
| Arachne        | ssp PhyloPythia (p:0.5)        | 3        | 352           | 367           | 95.91         | 1             | 0.983        | 0.950        | 0.562        | 0.924        |
| Phrap          | kmer (7mer)                    | 3        | 141           | 482           | 29.25         | 341           | 0.999        | 1.000        | 0.040        | 0.284        |
| Phrap          | kmer (8mer)                    | 3        | 258           | 482           | 53.53         | 224           | 0.948        | 0.670        | 0.063        | 0.448        |
| Phrap          | BLAST distr 1                  | 4        | 336           | 482           | 69.71         | 18            | 0.983        | 0.997        | 0.166        | 0.564        |
| Phrap          | BLAST distr 2                  | 4        | 404           | 482           | 83.82         | 29            | 0.973        | 0.979        | 0.184        | 0.643        |
| Phrap          | S-GSOM (CP=55%)                | 5        | 381           | 482           | 79.05         | 9             | 0.992        | 0.999        | 0.132        | 0.730        |
| Phrap          | gen PhyloPythia (p:0.85)       | 3        | 329           | 482           | 68.26         | 1             | 0.999        | 1.000        | 0.175        | 0.674        |
| Phrap          | ssp PhyloPythia (p:0.85)       | 3        | 341           | 482           | 70.75         | 1             | 0.999        | 1.000        | 0.185        | 0.699        |
| Phrap          | S-GSOM (CP=75%)                | 5        | 443           | 482           | 91.91         | 9             | 0.990        | 0.999        | 0.204        | 0.842        |
| Phrap          | gen PhyloPythia (p:0.5)        | 6        | 446           | 482           | 92.53         | 3             | 0.997        | 1.000        | 0.302        | 0.900        |
| <b>Phrap</b>   | <b>ssp PhyloPythia (p:0.5)</b> | <b>7</b> | <b>447</b>    | <b>482</b>    | <b>92.74</b>  | <b>3</b>      | <b>0.997</b> | <b>1.000</b> | <b>0.307</b> | <b>0.902</b> |

**xii. Class level,  $\geq 10$  reads, simMC**

| Assembler      | Method                         | Bins     | BinnedContigs | Total#Contigs | %ofBinContigs | #PredNotInAct | aSp          | wSp          | aSn          | wSn          |
|----------------|--------------------------------|----------|---------------|---------------|---------------|---------------|--------------|--------------|--------------|--------------|
| Arachne        | kmer (7mer)                    | 2        | 125           | 1372          | 9.11          | 1247          | 0.992        | 0.975        | 0.027        | 0.082        |
| Arachne        | kmer (8mer)                    | 2        | 250           | 1372          | 18.22         | 1122          | 0.979        | 0.965        | 0.047        | 0.132        |
| Arachne        | BLAST distr 1                  | 3        | 938           | 1372          | 68.37         | 111           | 0.967        | 0.964        | 0.321        | 0.588        |
| Arachne        | BLAST distr 2                  | 3        | 1102          | 1372          | 80.32         | 155           | 0.956        | 0.951        | 0.364        | 0.676        |
| Arachne        | S-GSOM (CP=55%)                | 3        | 1061          | 1372          | 77.33         | 0             | 0.999        | 1.000        | 0.267        | 0.771        |
| Arachne        | gen PhyloPythia (p:0.85)       | 3        | 933           | 1372          | 68            | 6             | 1.000        | 1.000        | 0.346        | 0.679        |
| Arachne        | ssp PhyloPythia (p:0.85)       | 3        | 980           | 1372          | 71.43         | 6             | 1.000        | 1.000        | 0.357        | 0.713        |
| Arachne        | S-GSOM (CP=75%)                | 3        | 1253          | 1372          | 91.33         | 0             | 0.993        | 0.985        | 0.395        | 0.900        |
| Arachne        | gen PhyloPythia (p:0.5)        | 3        | 1305          | 1372          | 95.12         | 23            | 1.000        | 1.000        | 0.461        | 0.950        |
| <b>Arachne</b> | <b>ssp PhyloPythia (p:0.5)</b> | <b>3</b> | <b>1307</b>   | <b>1372</b>   | <b>95.26</b>  | <b>22</b>     | <b>1.000</b> | <b>1.000</b> | <b>0.462</b> | <b>0.951</b> |
| Phrap          | kmer (7mer)                    | 2        | 142           | 1980          | 7.17          | 1838          | 1.000        | 0.999        | 0.016        | 0.070        |
| Phrap          | kmer (8mer)                    | 3        | 429           | 1980          | 21.67         | 1551          | 0.962        | 0.982        | 0.002        | 0.006        |
| Phrap          | BLAST distr 1                  | 4        | 1466          | 1980          | 74.04         | 31            | 0.971        | 0.963        | 0.272        | 0.606        |
| Phrap          | BLAST distr 2                  | 4        | 1748          | 1980          | 88.28         | 52            | 0.961        | 0.947        | 0.302        | 0.698        |
| Phrap          | S-GSOM (CP=55%)                | 4        | 1409          | 1980          | 71.16         | 9             | 0.998        | 0.993        | 0.171        | 0.706        |
| Phrap          | gen PhyloPythia (p:0.85)       | 4        | 1337          | 1980          | 67.53         | 2             | 0.999        | 1.000        | 0.226        | 0.671        |
| Phrap          | ssp PhyloPythia (p:0.85)       | 4        | 1349          | 1980          | 68.13         | 2             | 0.999        | 1.000        | 0.227        | 0.677        |
| Phrap          | S-GSOM (CP=75%)                | 4        | 1708          | 1980          | 86.26         | 9             | 0.997        | 0.991        | 0.254        | 0.856        |
| Phrap          | gen PhyloPythia (p:0.5)        | 4        | 1880          | 1980          | 94.95         | 7             | 0.998        | 0.999        | 0.305        | 0.935        |
| <b>Phrap</b>   | <b>ssp PhyloPythia (p:0.5)</b> | <b>4</b> | <b>1881</b>   | <b>1980</b>   | <b>95</b>     | <b>7</b>      | <b>0.998</b> | <b>0.999</b> | <b>0.306</b> | <b>0.937</b> |

## 7. GSOM settings and GSOM maps

### *GSOM settings in the paper*

All results (Including both experiments in comparison of semi-supervised algorithms and simulated metagenomic datasets) were generated using the default GSOM settings. The default GSOM settings are list below:

- Topology Type = Hexagon
- Similarity Measure = Euclidean
- Weight Initialisation Type = 0.5 for all nodes
- Neighbourhood Kernel = Gaussian Kernel
- Initial Learning Rates: Growing Phase = 0.1, First Smoothing Phase = 0.05, Second Smoothing Phase = 0.01
- Training Epochs: Growing Phase = 5, First Smoothing Phase = 50, Second Smoothing Phase = 50

Additionally, the Spread Factors used are:

- SF=0.1 for all the  $\geq 8$  kb simulated metagenome datasets.
- SF=0.2 for simLC,  $\geq 10$  read simulated metagenome datasets.
- SF=0.3 for simMC,  $\geq 10$  read simulated metagenome datasets.
- SF=0.85 for all artificially generated datasets.

### *GSOM map results for simulated metagenome datasets*

The trained GSOM maps for all simulated metagenomic datasets are shown below. Each hexagon represents a single node in the map. These maps are shown in the form of a distance map which visualises the distance of the weight vector of a node to each of its six neighbour nodes. The colour scale shows the exact Euclidean distance value which the colour represents.

Datasets: simLC,  $\geq 8$  kb

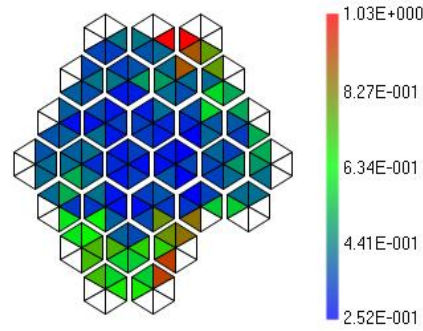

Figure 1: Arachne

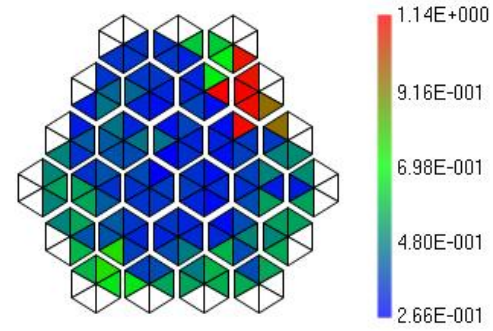

Phrap

Datasets: simMC,  $\geq 8$  kb

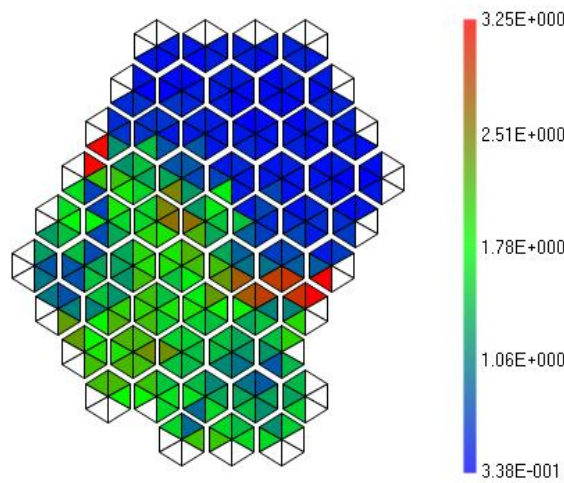

Figure 2: Arachne

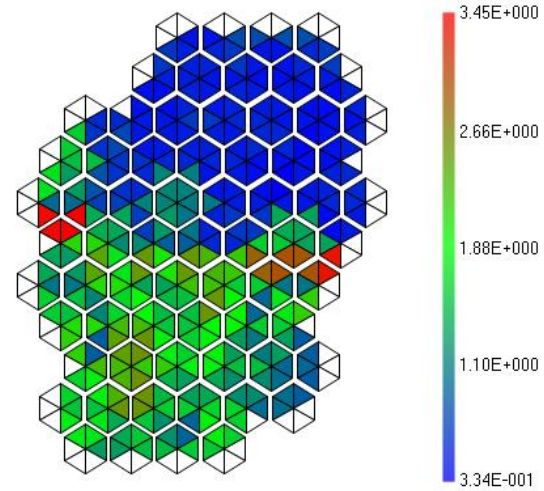

Phrap



Datasets: simLC,  $\geq 10$  reads

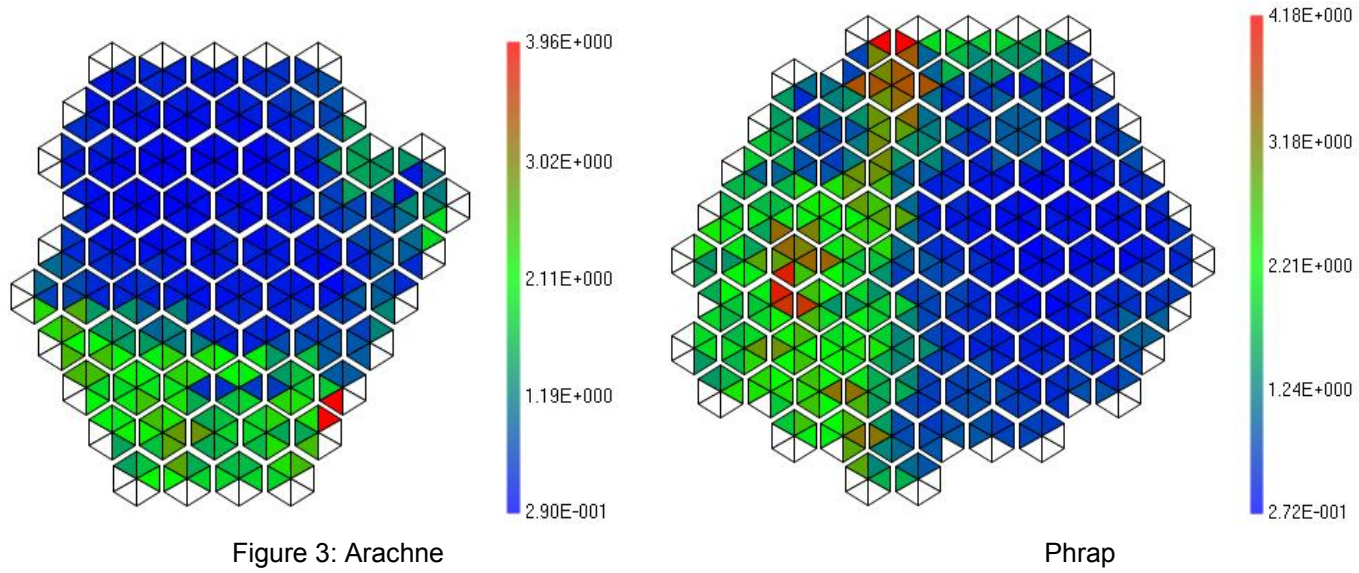

Datasets: simMC,  $\geq 10$  reads

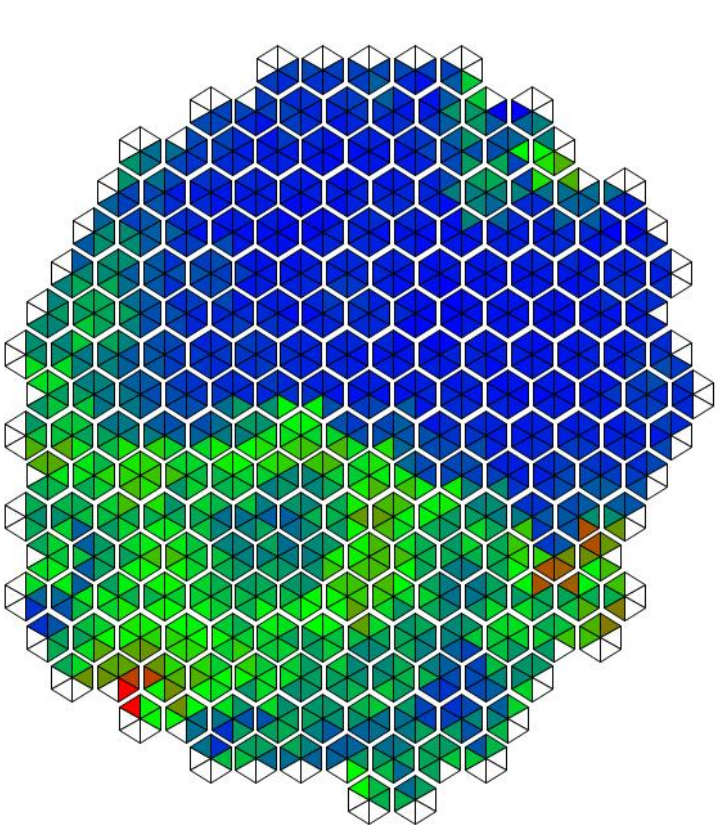

Figure 4: Arachne

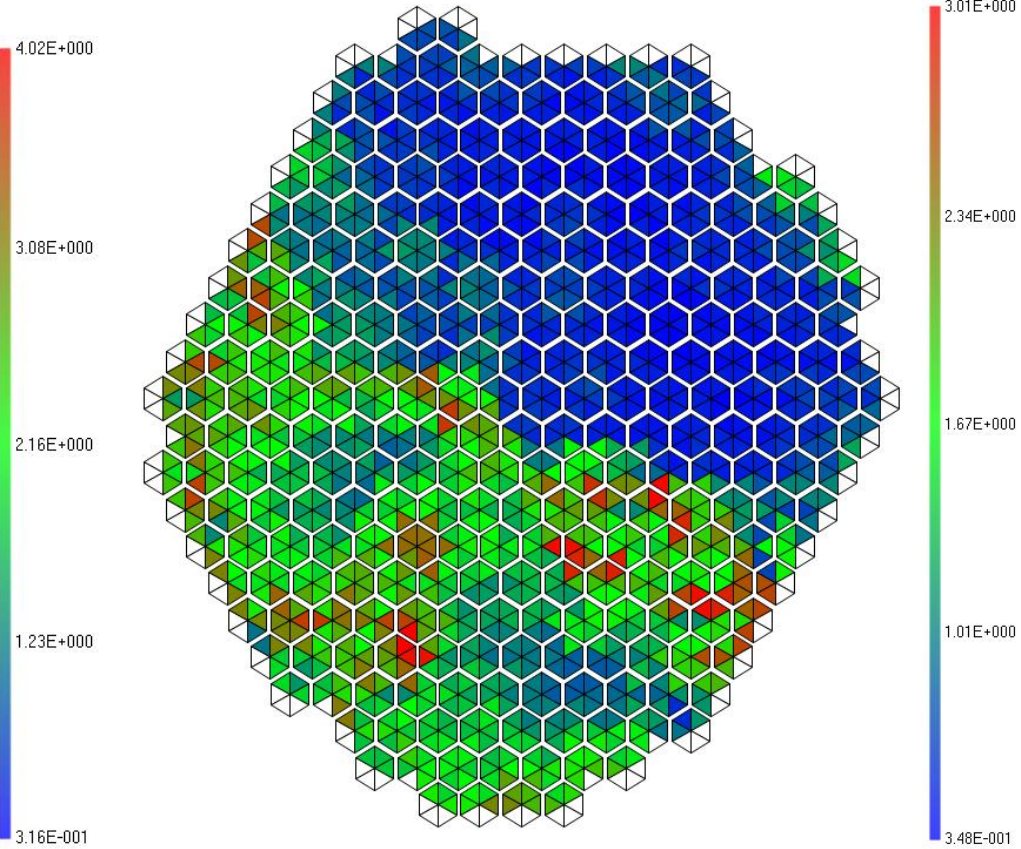

Phrap

## 8. Relationship between CP and the percentage of assigned samples

The following graph demonstrates the relationship between CP value and the percentage of assigned samples on the 40 species dataset.

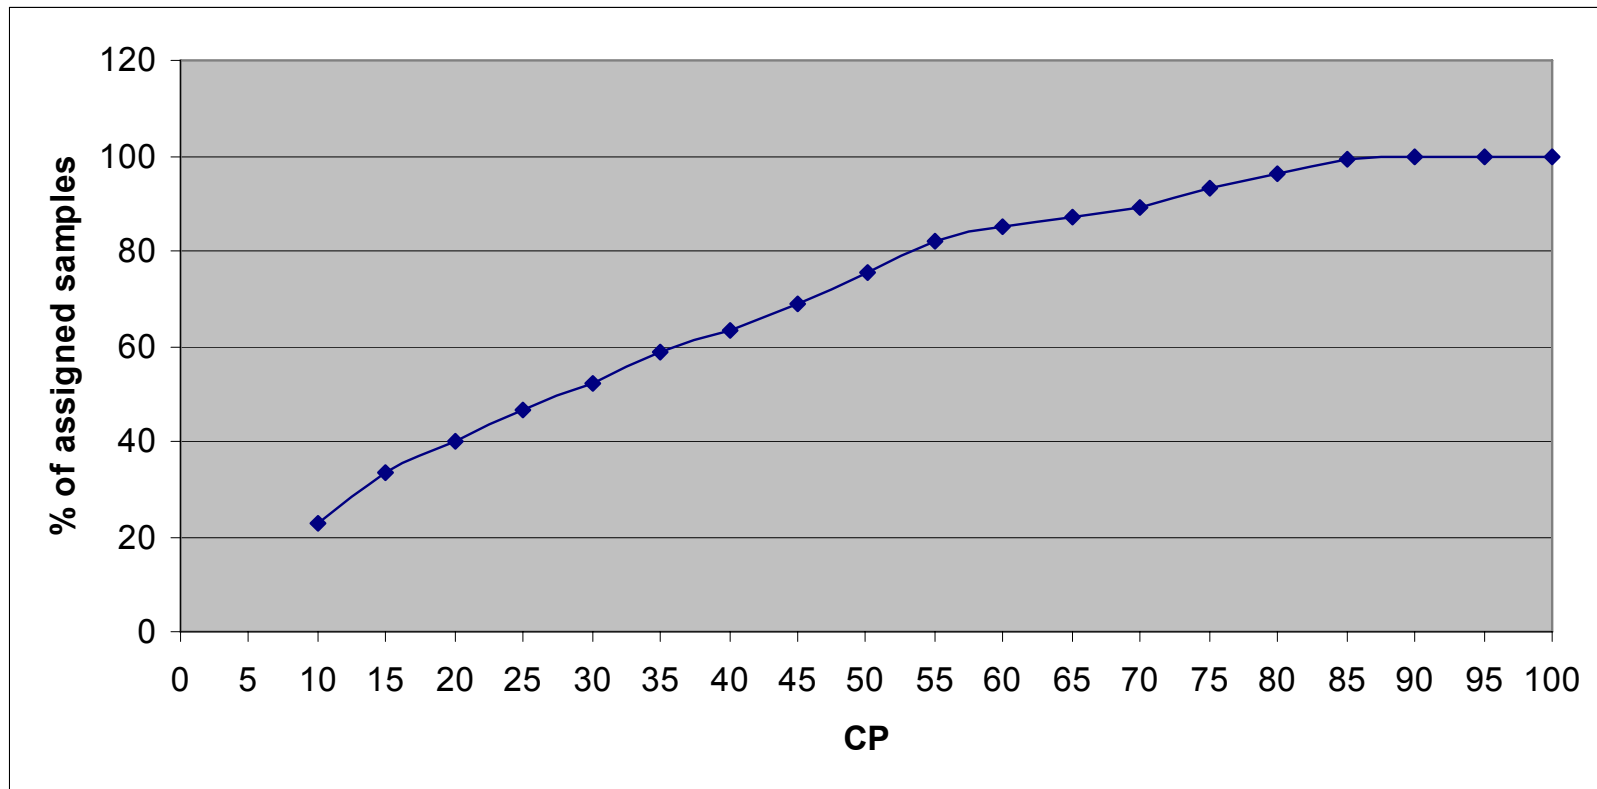

## 9. References

1. Wagstaff K, Cardie C, Rogers S, Schroedl S: **Constrained K-means Clustering with Background Knowledge**. In: *Proceedings of 18th International Conference on Machine Learning (ICML-01): 2001*; 2001: 577-584.
2. Basu S, Banerjee A, Mooney RJ: **Semi-supervised Clustering by Seeding**. In: *Proceedings of the Nineteenth International Conference on Machine Learning (ICML-2002): July 2002; Sydney, Australia*; 2002: 19-26.
3. Joachims T: **Transductive inference for text classification using support vector machines**. In: *Proceedings of ICML-99, 16th International Conference on Machine Learning: 1999*; Morgan Kaufmann Publishers, San Francisco, US; 1999: 200-209.
4. Bruzzone L, Chi M, Marconcini M: **A Novel Transductive SVM for Semisupervised Classification of Remote-Sensing Images**. *Geoscience and Remote Sensing, IEEE Transactions on* 2006, **44**(11):3363-3373.
5. van Rijsbergen CJ: **Information Retrieval**, 2nd edn. London: Butterworths; 1979.
6. Rand WM: **Objective Criteria for the Evaluation of Clustering Methods**. *Journal of the American Statistical Association* 1971, **66**(336):846-850.
7. Hubert L: **Comparing Partitions**. *Journal of Classification* 1985, **2**:193-218.
8. Mavromatis K, Ivanova N, Barry K, Shapiro H, Goltsman E, McHardy AC, Rigoutsos I, Salamov A, Korzeniewski F, Land M *et al*: **Use of simulated data sets to evaluate the fidelity of metagenomic processing methods**. *Nature Method* 2007, **4**(6):495-500.
9. Sandberg R, Winberg G, Branden C-I, Kaske A, Ernberg I, Coster J: **Capturing Whole-Genome Characteristics in Short Sequences Using a Naive Bayesian Classifier**. *Genome Res* 2001, **11**(8):1404-1409.
10. McHardy AC, Martin HG, Tsirigos A, Hugenholtz P, Rigoutsos I: **Accurate phylogenetic classification of variable-length DNA fragments**. *Nature Methods* 2007, **4**(1):63-72.
